# Supplementary material for: Ultrasensitive detection of H. pylori in human feces based on immunomagnetic bead capture and fluorescent quantum dots
Source: Royal Society of Chemistry journal article supplement (doi:10.1039/c9an00193j), 2019-01-01
Supplement: c9an00193j1.xlsx [file c9an00193j1.xlsx]

## Sheet: Sheet1
The initial optical data of Table 1 are as follows：
10^2 (CFU/mg)									10^3 (CFU/mg)									10^4 (CFU/mg)									10^5 (CFU/mg)									10^6 (CFU/mg)
NO.1			NO.2			NO.3			NO.1			NO.2			NO.3			NO.1			NO.2			NO.3			NO.1			NO.2			NO.3			NO.1			NO.2			NO.3
Maximal Wavelength (nm):119.3110			Maximal Wavelength (nm):118.6730			Maximal Wavelength (nm):123.7340			Maximal Wavelength (nm):179.6550			Maximal Wavelength (nm):172.8140			Maximal Wavelength (nm):172.9110			Maximal Wavelength (nm):231.6800			Maximal Wavelength (nm):233.9750			Maximal Wavelength (nm):226.5970			Maximal Wavelength (nm):279.3710			Maximal Wavelength (nm):290.4480			Maximal Wavelength (nm):270.0500			Maximal Wavelength (nm):337.9970			Maximal Wavelength (nm):343.6630			Maximal Wavelength (nm):329.8940
Flu Intensity (CPS)	Wavelength (nm)		Flu Intensity (CPS)	Wavelength (nm)		Flu Intensity (CPS)	Wavelength (nm)		Flu Intensity (CPS)	Wavelength (nm)		Flu Intensity (CPS)	Wavelength (nm)		Flu Intensity (CPS)	Wavelength (nm)		Flu Intensity (CPS)	Wavelength (nm)		Flu Intensity (CPS)	Wavelength (nm)		Flu Intensity (CPS)	Wavelength (nm)		Flu Intensity (CPS)	Wavelength (nm)		Flu Intensity (CPS)	Wavelength (nm)		Flu Intensity (CPS)	Wavelength (nm)		Flu Intensity (CPS)	Wavelength (nm)		Flu Intensity (CPS)	Wavelength (nm)		Flu Intensity (CPS)	Wavelength (nm)
400	13.012		400	12.46		400	11.719		400	11.053		400	9.917		400	12.674		400	13.107		400	12.9		400	12.136		400	11.961		400	14.37		400	11.711		400	14.619		400	17.525		400	14.81
400.5	12.001		400.5	12.7		400.5	12.714		400.5	11.534		400.5	9.959		400.5	13.359		400.5	13.063		400.5	11.325		400.5	13.145		400.5	11.221		400.5	15.23		400.5	10.616		400.5	14.118		400.5	16.634		400.5	14.757
401	11.657		401	12.013		401	12.701		401	11.72		401	9.265		401	13.82		401	13.037		401	12.099		401	12.701		401	11.605		401	14.772		401	10.955		401	14.714		401	18.317		401	15.271
401.5	12.122		401.5	12.464		401.5	11.928		401.5	11.633		401.5	10.199		401.5	13.979		401.5	12.826		401.5	13.925		401.5	13.681		401.5	11.469		401.5	14.71		401.5	11.206		401.5	13.836		401.5	17.641		401.5	15.856
402	13.002		402	12.316		402	11.969		402	11.23		402	10.864		402	12.829		402	14.151		402	12.79		402	13.254		402	11.763		402	15.757		402	12.31		402	15.899		402	18.045		402	14.736
402.5	12.101		402.5	11.489		402.5	13.039		402.5	12.153		402.5	11.341		402.5	14.986		402.5	13.374		402.5	13.259		402.5	13.531		402.5	11.959		402.5	14.986		402.5	12.013		402.5	14.414		402.5	17.916		402.5	15.483
403	12.733		403	13.23		403	12.337		403	11.627		403	10.981		403	14.34		403	13.982		403	13.631		403	13.571		403	12.597		403	14.755		403	11.526		403	14.164		403	18.898		403	15.453
403.5	13.756		403.5	12.738		403.5	13.489		403.5	11.714		403.5	10.812		403.5	14.317		403.5	13.979		403.5	14.272		403.5	13.706		403.5	12.264		403.5	15.908		403.5	12.488		403.5	14.211		403.5	18.477		403.5	16.395
404	12.415		404	13.272		404	12.859		404	12.02		404	11.015		404	15.377		404	13.981		404	13.363		404	14.216		404	12.247		404	15.653		404	11.347		404	14.395		404	18.656		404	14.94
404.5	13.033		404.5	13.005		404.5	13.445		404.5	12.318		404.5	11.856		404.5	13.599		404.5	13.943		404.5	14.423		404.5	14.574		404.5	12.015		404.5	16.344		404.5	12.116		404.5	15.035		404.5	18.531		404.5	16.44
405	13.888		405	13.797		405	12.863		405	12.494		405	11.542		405	15.606		405	14.749		405	14.472		405	14.661		405	12.756		405	16.86		405	12.26		405	13.787		405	18.692		405	15.203
405.5	14.147		405.5	14.166		405.5	14.962		405.5	12.529		405.5	10.887		405.5	16.082		405.5	14.208		405.5	14.056		405.5	15.513		405.5	12.519		405.5	16.721		405.5	12.044		405.5	14.402		405.5	18.649		405.5	16.459
406	13.191		406	14.664		406	12.99		406	12.584		406	11.76		406	15.098		406	12.349		406	15.013		406	15.533		406	13.153		406	16.566		406	12.854		406	14.161		406	18.75		406	16.405
406.5	14.411		406.5	13.954		406.5	14.035		406.5	12.718		406.5	11.846		406.5	16.361		406.5	14.707		406.5	14.513		406.5	14.068		406.5	12.584		406.5	15.564		406.5	12.939		406.5	13.469		406.5	18.926		406.5	16.599
407	14.294		407	14.17		407	14.501		407	12.954		407	11.853		407	16.079		407	15.022		407	14.138		407	15.215		407	12.351		407	16.193		407	12.068		407	13.922		407	19.384		407	16.304
407.5	14.638		407.5	13.63		407.5	13.58		407.5	12.743		407.5	11.943		407.5	15.948		407.5	14.384		407.5	14.314		407.5	15.151		407.5	13.48		407.5	17.526		407.5	12.423		407.5	13.639		407.5	19.012		407.5	18.03
408	14.354		408	13.202		408	14.383		408	13.412		408	12.385		408	14.524		408	15.249		408	15.289		408	15.411		408	12.743		408	17.984		408	13.728		408	13.353		408	19.475		408	17.206
408.5	15.036		408.5	15.676		408.5	13.72		408.5	13.35		408.5	12.852		408.5	15.815		408.5	14.541		408.5	15.279		408.5	14.811		408.5	13.926		408.5	16.841		408.5	13.264		408.5	14.032		408.5	18.835		408.5	16.864
409	14.998		409	15.405		409	14.208		409	12.897		409	12.051		409	16.105		409	15.087		409	15.377		409	14.497		409	13.815		409	17.462		409	12.799		409	13.43		409	19.694		409	17.555
409.5	15.001		409.5	14.978		409.5	14.652		409.5	13.132		409.5	10.737		409.5	15.445		409.5	14.821		409.5	15.699		409.5	14.994		409.5	13.8		409.5	16.669		409.5	12.26		409.5	12.399		409.5	18.547		409.5	17.759
410	14.774		410	15.218		410	14.208		410	13.224		410	12.458		410	16.33		410	14.166		410	15.391		410	15.32		410	14.056		410	17.028		410	12.64		410	13.851		410	19.378		410	17.375
410.5	14.1		410.5	14.854		410.5	14.743		410.5	13.092		410.5	13.799		410.5	16.578		410.5	15.348		410.5	15.477		410.5	15.857		410.5	14.585		410.5	17.847		410.5	12.823		410.5	13.809		410.5	18.908		410.5	17.595
411	14.697		411	14.207		411	14.509		411	13.177		411	13.144		411	15.943		411	15.47		411	15.522		411	16.387		411	13.554		411	18.166		411	12.881		411	13.62		411	19.238		411	18.224
411.5	14.401		411.5	15.489		411.5	13.87		411.5	13.14		411.5	14.041		411.5	15.564		411.5	15.669		411.5	15.507		411.5	16.161		411.5	12.928		411.5	17.578		411.5	13.286		411.5	14.147		411.5	19.347		411.5	17.714
412	15.198		412	15.264		412	14.386		412	12.858		412	12.866		412	16.312		412	15.956		412	15.561		412	15.589		412	14.792		412	17.914		412	12.81		412	12.926		412	19.423		412	18.356
412.5	15.237		412.5	15.788		412.5	15.198		412.5	13.134		412.5	12.701		412.5	16.29		412.5	15.124		412.5	15.51		412.5	14.664		412.5	13.506		412.5	18.569		412.5	13.478		412.5	13.32		412.5	18.888		412.5	17.837
413	14.802		413	15.538		413	14.641		413	13.516		413	13.002		413	16.946		413	15.54		413	15.053		413	15.661		413	13.327		413	19.436		413	12.652		413	14.238		413	20.038		413	17.847
413.5	14.019		413.5	15.901		413.5	13.605		413.5	13.01		413.5	12.362		413.5	15.531		413.5	15.929		413.5	14.479		413.5	14.831		413.5	14.036		413.5	19.724		413.5	13.411		413.5	13.271		413.5	19.717		413.5	18.23
414	15.174		414	15.339		414	14.086		414	12.609		414	13.317		414	16.634		414	14.477		414	15.251		414	15.513		414	12.731		414	17.984		414	13.13		414	13.048		414	19.494		414	18.776
414.5	15.23		414.5	15.513		414.5	14.656		414.5	12.891		414.5	12.632		414.5	15.82		414.5	15.294		414.5	16.245		414.5	15.826		414.5	12.957		414.5	18.075		414.5	13.264		414.5	13.262		414.5	18.808		414.5	18.456
415	15.31		415	15.742		415	14.992		415	14.275		415	13.606		415	16.358		415	14.613		415	14.877		415	15.316		415	13.852		415	18.7		415	13.494		415	12.297		415	19.487		415	18.175
415.5	14.255		415.5	16.052		415.5	15.379		415.5	13.298		415.5	12.095		415.5	16.394		415.5	15.393		415.5	15.578		415.5	16.664		415.5	13.846		415.5	18.043		415.5	13.714		415.5	12.84		415.5	18.637		415.5	17.974
416	15.377		416	15.51		416	14.375		416	13.761		416	12.804		416	16.37		416	15.735		416	15.68		416	15.717		416	14.208		416	18.8		416	13.13		416	12.202		416	20.513		416	17.905
416.5	15.549		416.5	14.848		416.5	13.907		416.5	12.867		416.5	11.541		416.5	15.131		416.5	15.529		416.5	14.359		416.5	14.516		416.5	13.914		416.5	18.494		416.5	12.556		416.5	14.484		416.5	19.723		416.5	18.271
417	14.803		417	15.09		417	14.939		417	12.933		417	12.757		417	15.766		417	15.192		417	15.678		417	15.565		417	13.119		417	18.304		417	12.369		417	13.186		417	18.791		417	18.384
417.5	14.135		417.5	14.87		417.5	14.959		417.5	12.483		417.5	12.757		417.5	16.706		417.5	15.484		417.5	15.528		417.5	15.528		417.5	13.414		417.5	19.063		417.5	12.972		417.5	12.546		417.5	19.637		417.5	18.427
418	14.168		418	14.792		418	14.028		418	13.158		418	12.153		418	17.034		418	15.808		418	15.044		418	15.519		418	12.726		418	18.492		418	13.099		418	12.053		418	18.148		418	18.306
418.5	14.578		418.5	16.141		418.5	14.714		418.5	13.131		418.5	11.829		418.5	15.857		418.5	16.093		418.5	15.525		418.5	15.652		418.5	13.319		418.5	18.987		418.5	12.009		418.5	12.085		418.5	18.798		418.5	17.99
419	14.154		419	15.635		419	14.428		419	12.912		419	12.158		419	15.345		419	16.207		419	15.274		419	15.28		419	13.032		419	17.875		419	12.413		419	12.833		419	18.794		419	17.97
419.5	14.252		419.5	13.331		419.5	14.205		419.5	11.841		419.5	11.422		419.5	15.481		419.5	15.9		419.5	15.088		419.5	14.934		419.5	12.876		419.5	19.86		419.5	11.965		419.5	12.82		419.5	19.048		419.5	18.425
420	14.962		420	14.503		420	14.006		420	12.806		420	11.485		420	16.334		420	16.405		420	14.876		420	15.259		420	12.579		420	18.442		420	12.757		420	13.277		420	19.557		420	18.859
420.5	13.962		420.5	15.25		420.5	14.661		420.5	12.835		420.5	11.125		420.5	16.577		420.5	14.83		420.5	15.053		420.5	16.666		420.5	13.667		420.5	19.108		420.5	12.947		420.5	13.662		420.5	19.631		420.5	19.077
421	14.886		421	14.426		421	14.023		421	11.781		421	12.55		421	15.992		421	14.948		421	15.427		421	14.792		421	13.059		421	18.184		421	12.358		421	12.548		421	17.82		421	18.053
421.5	14.189		421.5	14.374		421.5	13.759		421.5	11.943		421.5	11.853		421.5	16.083		421.5	13.98		421.5	13.981		421.5	14.811		421.5	12.805		421.5	18.415		421.5	12.649		421.5	12.497		421.5	17.887		421.5	18.387
422	14.168		422	13.944		422	13.519		422	13.126		422	11.392		422	16.489		422	15.019		422	15.287		422	15.115		422	12.572		422	19.108		422	11.975		422	13.236		422	17.606		422	17.801
422.5	13.231		422.5	13.701		422.5	13.545		422.5	12.203		422.5	11.132		422.5	15.728		422.5	14.676		422.5	15.104		422.5	15.259		422.5	12.5		422.5	19.562		422.5	11.387		422.5	12.843		422.5	17.47		422.5	17.714
423	13.182		423	14.691		423	13.739		423	12.492		423	11.424		423	14.61		423	14.424		423	14.979		423	15.849		423	12.166		423	19.319		423	11.103		423	12.146		423	17.576		423	18.25
423.5	13.627		423.5	14.906		423.5	13.092		423.5	13.07		423.5	12.053		423.5	15.033		423.5	15.15		423.5	14.501		423.5	14.521		423.5	12.242		423.5	20.264		423.5	11.403		423.5	12.723		423.5	18.699		423.5	17.722
424	13.002		424	13.568		424	13.356		424	11.74		424	12.128		424	15.305		424	13.756		424	13.413		424	14.795		424	12.247		424	19.242		424	12.202		424	14.678		424	17.581		424	18.537
424.5	13.492		424.5	13.804		424.5	14.472		424.5	11.958		424.5	10.869		424.5	15.76		424.5	13.474		424.5	14.948		424.5	14.497		424.5	12.896		424.5	19.482		424.5	11.748		424.5	12.192		424.5	17.246		424.5	18.103
425	14.406		425	14.707		425	13.647		425	11.609		425	12.117		425	14.623		425	14.277		425	15.161		425	14.811		425	12.027		425	20.203		425	11.901		425	12.361		425	17.252		425	17.563
425.5	14.35		425.5	13.758		425.5	13.869		425.5	11.347		425.5	11.656		425.5	14.649		425.5	14.266		425.5	14.913		425.5	13.98		425.5	10.611		425.5	20.416		425.5	11.601		425.5	12.389		425.5	17.621		425.5	16.86
426	14.24		426	14.497		426	13.857		426	12.12		426	10.931		426	14.384		426	14.574		426	14.49		426	14.495		426	11.066		426	20.38		426	11.422		426	12.595		426	17.351		426	17.059
426.5	14.238		426.5	12.995		426.5	13.499		426.5	11.616		426.5	11.602		426.5	15.029		426.5	14.211		426.5	13.557		426.5	14.818		426.5	12.71		426.5	20.493		426.5	11.713		426.5	12.95		426.5	16.866		426.5	17.946
427	13.547		427	12.954		427	13.822		427	11.559		427	10.409		427	14.181		427	15.148		427	14.472		427	14.578		427	12.55		427	20.392		427	11.346		427	12.125		427	16.816		427	17.915
427.5	12.822		427.5	13.234		427.5	13.806		427.5	11.078		427.5	10.868		427.5	15.025		427.5	14.252		427.5	14.332		427.5	14.141		427.5	11.468		427.5	21.024		427.5	10.926		427.5	11.9		427.5	17.977		427.5	17.185
428	15.345		428	12.852		428	13.769		428	10.397		428	10.668		428	14.892		428	13.145		428	14.78		428	14.268		428	11.44		428	20.804		428	10.536		428	12.303		428	18.237		428	18.502
428.5	13.962		428.5	13.78		428.5	12.709		428.5	10.464		428.5	11.502		428.5	14.592		428.5	13.837		428.5	13.422		428.5	14.962		428.5	11.591		428.5	20.516		428.5	11.831		428.5	12.472		428.5	16.314		428.5	18.04
429	13.664		429	13.955		429	14.091		429	11.57		429	10.756		429	14.953		429	13.306		429	14.208		429	14.644		429	11.055		429	20.775		429	11.627		429	10.901		429	17.271		429	17.585
429.5	13.87		429.5	13.944		429.5	13.925		429.5	11.488		429.5	9.899		429.5	15.365		429.5	14.193		429.5	13.611		429.5	13.568		429.5	10.795		429.5	20.642		429.5	11.337		429.5	12.012		429.5	18.153		429.5	17.783
430	13.717		430	12.78		430	13.509		430	10.781		430	10.749		430	16.155		430	13.422		430	14.522		430	14.738		430	12.382		430	21.71		430	11.816		430	12.391		430	17.063		430	18.194
430.5	14.73		430.5	13.347		430.5	13.501		430.5	10.931		430.5	11.165		430.5	14.624		430.5	13.987		430.5	14.705		430.5	14.6		430.5	11.655		430.5	21.16		430.5	10.337		430.5	12.936		430.5	17.588		430.5	18.382
431	13.643		431	13.074		431	13.071		431	10.757		431	11.552		431	14.791		431	13.982		431	14.096		431	14.568		431	12.023		431	21.736		431	10.865		431	11.954		431	16.548		431	17.138
431.5	14.049		431.5	13.603		431.5	13.507		431.5	11.212		431.5	10.639		431.5	14.867		431.5	13.991		431.5	13.71		431.5	15.01		431.5	12.356		431.5	22.271		431.5	10.899		431.5	11.943		431.5	17.409		431.5	18.573
432	13.888		432	12.76		432	13.006		432	11.327		432	10.652		432	15.681		432	14.205		432	14.618		432	14.589		432	11.804		432	21.882		432	10.736		432	12.474		432	16.551		432	18.004
432.5	13.059		432.5	13.031		432.5	13.571		432.5	10.615		432.5	11.363		432.5	14.954		432.5	14.416		432.5	13.718		432.5	14.472		432.5	12.072		432.5	21.753		432.5	11.276		432.5	11.755		432.5	16.51		432.5	18.656
433	14.612		433	13.558		433	13.459		433	10.664		433	10.476		433	15.373		433	13.963		433	14.479		433	13.132		433	11.154		433	21.991		433	11.012		433	12.594		433	15.604		433	17.281
433.5	14.56		433.5	13.776		433.5	14.054		433.5	11.041		433.5	11.005		433.5	14.682		433.5	14.137		433.5	14.208		433.5	13.925		433.5	11.237		433.5	22.267		433.5	11.024		433.5	11.953		433.5	15.309		433.5	18.326
434	13.163		434	14.517		434	13.395		434	11.189		434	10.635		434	14.774		434	13.387		434	13.86		434	14.711		434	10.254		434	22.999		434	10.894		434	12.474		434	15.664		434	17.677
434.5	13.685		434.5	13.376		434.5	13.781		434.5	10.934		434.5	10.57		434.5	14.766		434.5	14.011		434.5	13.231		434.5	14.181		434.5	11.52		434.5	21.828		434.5	11.732		434.5	12.509		434.5	16.545		434.5	18.076
435	13.476		435	13.228		435	13.737		435	10.704		435	11.008		435	15.032		435	13.768		435	14.499		435	14.475		435	11.771		435	22.505		435	10.078		435	12.155		435	16.359		435	17.813
435.5	12.415		435.5	13.81		435.5	14.043		435.5	11.633		435.5	10.451		435.5	14.449		435.5	14.279		435.5	13.001		435.5	13.856		435.5	11.653		435.5	23.116		435.5	9.866		435.5	12.527		435.5	16.255		435.5	17.36
436	13.145		436	12.891		436	12.982		436	11.738		436	10.534		436	14.524		436	13.851		436	13.733		436	14.093		436	11.44		436	22.159		436	10.574		436	11.683		436	17.413		436	18.596
436.5	13.878		436.5	13.585		436.5	13.906		436.5	11.369		436.5	11.306		436.5	13.853		436.5	14.493		436.5	14.472		436.5	14.516		436.5	11.629		436.5	23.474		436.5	11.096		436.5	11.985		436.5	16.529		436.5	18.073
437	12.833		437	13.746		437	13.571		437	10.975		437	10.699		437	14.427		437	13.961		437	13.605		437	13.459		437	11.483		437	23.321		437	10.296		437	11.986		437	17.892		437	18.406
437.5	13.349		437.5	13.332		437.5	12.362		437.5	10.738		437.5	11.368		437.5	14.151		437.5	13.907		437.5	14.661		437.5	14.017		437.5	11.616		437.5	22.915		437.5	10.657		437.5	12.078		437.5	16.051		437.5	18.386
438	12.399		438	13.568		438	13.162		438	10.76		438	10.744		438	15.538		438	13.945		438	13.856		438	14.412		438	11.781		438	23.771		438	10.593		438	11.674		438	15.405		438	18.354
438.5	13.766		438.5	13.614		438.5	12.851		438.5	11.646		438.5	11.13		438.5	13.157		438.5	12.924		438.5	14.156		438.5	14.397		438.5	11.4		438.5	23.673		438.5	9.971		438.5	12.767		438.5	15.265		438.5	19.135
439	13.21		439	12.934		439	12.189		439	11.194		439	10.937		439	14.337		439	14.127		439	13.569		439	13.107		439	11.007		439	24.387		439	10.799		439	11.635		439	15.598		439	18.019
439.5	12.939		439.5	13.212		439.5	13.536		439.5	11.464		439.5	11.064		439.5	14.106		439.5	14.393		439.5	13.951		439.5	14.271		439.5	11.436		439.5	24.494		439.5	10.203		439.5	11.825		439.5	15.621		439.5	18.087
440	13.002		440	13.002		440	13.333		440	10.928		440	10.468		440	14.524		440	14.183		440	14.051		440	13.513		440	11.092		440	24.119		440	10.465		440	10.871		440	15.684		440	18.291
440.5	14.52		440.5	12.959		440.5	13.462		440.5	10.337		440.5	9.667		440.5	13.787		440.5	14.042		440.5	15.574		440.5	13.646		440.5	10.796		440.5	23.846		440.5	10.233		440.5	11.111		440.5	15.863		440.5	18.218
441	12.976		441	12.538		441	12.597		441	11.821		441	10.161		441	14.253		441	13.691		441	14.246		441	12.701		441	10.646		441	23.407		441	10.411		441	11.538		441	15.122		441	19.591
441.5	12.799		441.5	12.313		441.5	13.02		441.5	10.967		441.5	10.607		441.5	13.565		441.5	13.238		441.5	14.133		441.5	13.635		441.5	11.718		441.5	23.131		441.5	10.566		441.5	11.558		441.5	15.586		441.5	17.642
442	12.927		442	12.794		442	13.276		442	10.433		442	9.881		442	13.151		442	13.684		442	13.731		442	14.081		442	10.964		442	24.526		442	10.416		442	11.295		442	14.502		442	18.589
442.5	12.748		442.5	11.61		442.5	12.89		442.5	10.491		442.5	10.514		442.5	13.992		442.5	13.017		442.5	12.91		442.5	13.776		442.5	10.773		442.5	23.716		442.5	10.661		442.5	10.956		442.5	15.772		442.5	18.283
443	13.121		443	11.957		443	12.998		443	11.126		443	10.411		443	14.515		443	13.058		443	14.362		443	13.061		443	11.131		443	25.34		443	10.441		443	11.613		443	15.439		443	17.906
443.5	11.981		443.5	12.493		443.5	13.192		443.5	10.33		443.5	9.958		443.5	14.447		443.5	13.125		443.5	12.765		443.5	12.861		443.5	10.546		443.5	24.63		443.5	9.873		443.5	10.997		443.5	15.163		443.5	17.911
444	12.874		444	12.447		444	12.387		444	9.923		444	10.327		444	13.163		444	13.605		444	14.233		444	13.492		444	11.08		444	25.465		444	9.418		444	9.802		444	14.777		444	18.514
444.5	12.643		444.5	11.832		444.5	12.399		444.5	10.769		444.5	10.298		444.5	13.164		444.5	13.153		444.5	13.464		444.5	12.965		444.5	10.677		444.5	25.569		444.5	10.277		444.5	11.952		444.5	15.211		444.5	17.576
445	12.273		445	12.412		445	12.512		445	10.457		445	10.55		445	13.792		445	12.091		445	12.675		445	12.349		445	10.845		445	24.247		445	10.004		445	10.706		445	14.533		445	17.675
445.5	13.33		445.5	12.614		445.5	12.714		445.5	10.385		445.5	9.5		445.5	13.402		445.5	13.5		445.5	13.002		445.5	13.455		445.5	10.59		445.5	25.274		445.5	9.859		445.5	11.841		445.5	14.195		445.5	18.188
446	13.012		446	13.02		446	12.215		446	10.217		446	10.863		446	14.793		446	14.939		446	13.207		446	12.856		446	11.259		446	25.628		446	10.08		446	10.848		446	14.554		446	17.524
446.5	12.355		446.5	12.931		446.5	12.274		446.5	9.977		446.5	9.424		446.5	13.18		446.5	12.955		446.5	13.479		446.5	13.535		446.5	10.136		446.5	25.262		446.5	9.644		446.5	12.749		446.5	14.086		446.5	17.738
447	12.52		447	11.216		447	12.294		447	9.956		447	9.664		447	12.727		447	13.215		447	13.957		447	13.147		447	10.518		447	25.073		447	9.798		447	11.418		447	14.328		447	17.401
447.5	12.848		447.5	11.885		447.5	12.597		447.5	10.128		447.5	10.17		447.5	13.328		447.5	13.044		447.5	11.952		447.5	14.094		447.5	10.462		447.5	24.868		447.5	9.962		447.5	11.115		447.5	13.932		447.5	17.521
448	12.837		448	10.109		448	12.851		448	10.214		448	9.757		448	13.561		448	13.907		448	13.102		448	12.92		448	11.224		448	26.231		448	8.628		448	11.624		448	14.02		448	17.591
448.5	11.938		448.5	12.263		448.5	11.502		448.5	9.941		448.5	11.042		448.5	13.056		448.5	12.085		448.5	13.717		448.5	12.579		448.5	10.072		448.5	24.157		448.5	9.235		448.5	10.575		448.5	14.711		448.5	17.225
449	12.815		449	11.37		449	12.477		449	10.074		449	9.757		449	12.752		449	12.355		449	13.455		449	13.132		449	10.35		449	24.901		449	9.292		449	11.384		449	14.28		449	18.252
449.5	12.479		449.5	11.601		449.5	12.663		449.5	10.27		449.5	9.694		449.5	12.849		449.5	13.087		449.5	13.869		449.5	13.417		449.5	10.381		449.5	25.658		449.5	9.698		449.5	10.525		449.5	14.666		449.5	17.737
450	11.395		450	11.589		450	12.602		450	9.841		450	10.133		450	14.061		450	12.937		450	12.95		450	13.06		450	10.309		450	25.059		450	8.757		450	11.1		450	14.218		450	17.28
450.5	12.026		450.5	12.262		450.5	12.11		450.5	9.843		450.5	9.851		450.5	13.558		450.5	12.307		450.5	13.39		450.5	12.777		450.5	9.993		450.5	25.889		450.5	9.719		450.5	10.103		450.5	13.626		450.5	18.153
451	12.208		451	11.804		451	12.473		451	9.874		451	9.325		451	13.661		451	12.237		451	12.546		451	12.523		451	9.757		451	24.756		451	9.597		451	10.821		451	13.835		451	18.277
451.5	12.748		451.5	11.433		451.5	12.985		451.5	9.868		451.5	9.822		451.5	13.713		451.5	11.929		451.5	13.299		451.5	13.33		451.5	9.745		451.5	25.394		451.5	9.06		451.5	11.075		451.5	14.019		451.5	17.481
452	13.002		452	12.099		452	12.133		452	9.042		452	10.261		452	13.621		452	13.262		452	13.088		452	12.261		452	9.414		452	26.231		452	10.115		452	10.269		452	14.213		452	16.72
452.5	11.936		452.5	11.443		452.5	12.164		452.5	9.352		452.5	9.738		452.5	12.725		452.5	12.478		452.5	12.399		452.5	12.497		452.5	9.343		452.5	25.166		452.5	9.836		452.5	11.861		452.5	13.492		452.5	16.792
453	12.191		453	11.489		453	11.08		453	9.258		453	9.591		453	13.633		453	12.126		453	12.266		453	12.84		453	9.555		453	25.25		453	9.821		453	11.184		453	13.319		453	17.289
453.5	12.406		453.5	10.813		453.5	11.457		453.5	9.988		453.5	9.364		453.5	13.956		453.5	12.623		453.5	12.726		453.5	11.909		453.5	9.697		453.5	25.24		453.5	9.717		453.5	10.586		453.5	13.673		453.5	17.571
454	12.117		454	11.627		454	11.296		454	10.118		454	8.88		454	12.514		454	11.931		454	12.517		454	13.794		454	9.365		454	26.544		454	9.331		454	10.905		454	13.532		454	17.372
454.5	13.074		454.5	11.676		454.5	11.697		454.5	9.309		454.5	9.845		454.5	12.52		454.5	12.551		454.5	12.496		454.5	13.083		454.5	10.311		454.5	25.305		454.5	9.85		454.5	10.652		454.5	13.81		454.5	16.897
455	12.514		455	10.587		455	12.344		455	9.264		455	9.021		455	12.238		455	12.144		455	12.701		455	13.605		455	9.878		455	26.069		455	9.206		455	11.518		455	12.77		455	18.204
455.5	11.997		455.5	10.74		455.5	11.703		455.5	9.664		455.5	9.598		455.5	12.466		455.5	11.839		455.5	12.718		455.5	12.857		455.5	9.689		455.5	25.199		455.5	9.581		455.5	10.421		455.5	14.019		455.5	17.31
456	11.941		456	12.059		456	12.586		456	9.972		456	9.585		456	12.674		456	12.837		456	12.676		456	12.66		456	9.19		456	25.889		456	9.463		456	13.028		456	13.896		456	16.599
456.5	12.728		456.5	11.22		456.5	10.59		456.5	9.426		456.5	8.724		456.5	12.294		456.5	12.751		456.5	12.646		456.5	12.467		456.5	10.028		456.5	25.335		456.5	9.798		456.5	10.394		456.5	13.453		456.5	16.79
457	12.136		457	10.975		457	12.852		457	9.993		457	10.157		457	12.827		457	12.198		457	13.001		457	13.135		457	9.667		457	25.027		457	9.646		457	10.676		457	13.409		457	17.637
457.5	12.081		457.5	11.126		457.5	12.126		457.5	10.173		457.5	9.478		457.5	13.2		457.5	13.152		457.5	12.514		457.5	11.774		457.5	9.725		457.5	24.488		457.5	9.021		457.5	10.268		457.5	13.14		457.5	18.017
458	12.378		458	10.789		458	12.007		458	9.004		458	10.036		458	12.665		458	12.415		458	13.329		458	13.084		458	9.634		458	26.702		458	10.278		458	11.31		458	13.735		458	17.545
458.5	11.977		458.5	11.056		458.5	11.449		458.5	9.393		458.5	8.762		458.5	12.279		458.5	12.528		458.5	13.044		458.5	11.831		458.5	9.755		458.5	24.414		458.5	9.733		458.5	10.408		458.5	12.805		458.5	17.886
459	11.109		459	10.808		459	11.961		459	8.564		459	9.661		459	12.693		459	12.129		459	13.568		459	12.611		459	9.527		459	25.854		459	9.966		459	10.39		459	13.973		459	18.044
459.5	11.986		459.5	10.652		459.5	12.296		459.5	9.171		459.5	9.035		459.5	13.166		459.5	12.252		459.5	12.888		459.5	13.105		459.5	9.228		459.5	26.555		459.5	9.046		459.5	10.939		459.5	14.222		459.5	17.304
460	12.579		460	10.494		460	11.569		460	9.373		460	9.511		460	13.02		460	12.714		460	13.199		460	13.389		460	10.066		460	25.91		460	9.733		460	11.414		460	13.035		460	17.488
460.5	11.998		460.5	10.962		460.5	12.349		460.5	9.795		460.5	9.736		460.5	13.44		460.5	12.726		460.5	12.164		460.5	12.399		460.5	9.881		460.5	25.998		460.5	9.306		460.5	11.51		460.5	12.459		460.5	18.223
461	11.926		461	10.085		461	11.395		461	9.166		461	9.616		461	12.782		461	12.442		461	11.909		461	13.334		461	10.39		461	26.264		461	9.43		461	10.727		461	13.803		461	16.835
461.5	11.285		461.5	10.755		461.5	10.55		461.5	8.847		461.5	8.853		461.5	13.046		461.5	12.776		461.5	12.173		461.5	13.459		461.5	10.72		461.5	24.767		461.5	10.608		461.5	11.519		461.5	13.452		461.5	17.168
462	10.522		462	10.588		462	11.979		462	9.432		462	9.116		462	13.504		462	12.093		462	12.377		462	12.079		462	10.244		462	25.619		462	9.598		462	11.529		462	13.864		462	16.966
462.5	11.073		462.5	10.875		462.5	11.722		462.5	9.886		462.5	9.095		462.5	13.174		462.5	12.209		462.5	13.183		462.5	13.175		462.5	10.772		462.5	26.968		462.5	9.732		462.5	12.627		462.5	13.178		462.5	16.471
463	12.126		463	11.171		463	11.512		463	9.799		463	9.33		463	13.195		463	12.798		463	12.822		463	12.87		463	10.867		463	25.439		463	9.611		463	12.154		463	12.912		463	18.664
463.5	12.031		463.5	10.522		463.5	11.758		463.5	9.668		463.5	10.135		463.5	11.894		463.5	12.262		463.5	12.811		463.5	12.182		463.5	10.329		463.5	24.402		463.5	9.221		463.5	11.078		463.5	13.48		463.5	18.121
464	12.263		464	9.957		464	11.424		464	9.222		464	9.843		464	12.867		464	13.002		464	13.161		464	12.387		464	10.606		464	25.619		464	9.258		464	11.395		464	12.893		464	17.927
464.5	11.635		464.5	9.668		464.5	12.08		464.5	9.461		464.5	9.116		464.5	12.803		464.5	12.655		464.5	12.399		464.5	12.533		464.5	11.106		464.5	25.14		464.5	9.728		464.5	11.731		464.5	14.028		464.5	18.036
465	11.7		465	10.907		465	13.012		465	9.449		465	9.16		465	13.628		465	12.992		465	13.002		465	14.058		465	10.873		465	25.719		465	9.953		465	11.005		465	13.636		465	18.384
465.5	11.843		465.5	10.955		465.5	12.399		465.5	9.807		465.5	10.663		465.5	13.118		465.5	13.371		465.5	13.568		465.5	13.564		465.5	10.524		465.5	25.815		465.5	10.193		465.5	11.622		465.5	13.983		465.5	17.949
466	11.891		466	11.44		466	12.562		466	9.7		466	9.924		466	13.715		466	13.313		466	12.924		466	12.966		466	11.166		466	27.468		466	10.715		466	13.572		466	13.996		466	18.94
466.5	11.587		466.5	10.574		466.5	11.934		466.5	10.231		466.5	10.095		466.5	13.095		466.5	13.815		466.5	13.633		466.5	13.198		466.5	11.859		466.5	26.495		466.5	9.499		466.5	12.714		466.5	14.377		466.5	18.043
467	12.075		467	10.986		467	11.956		467	9.888		467	10.624		467	12.929		467	13.92		467	14.258		467	13.104		467	11.843		467	26.63		467	10.358		467	12.75		467	15.233		467	18.223
467.5	12.854		467.5	10.8		467.5	12.613		467.5	10.136		467.5	10.596		467.5	12.843		467.5	14.07		467.5	13.16		467.5	13.575		467.5	12.063		467.5	25.393		467.5	10.239		467.5	13.048		467.5	14.864		467.5	19.327
468	12.701		468	11.17		468	12.367		468	9.823		468	10.671		468	13.43		468	13.212		468	13.956		468	13.476		468	11.457		468	25.912		468	12.389		468	13.943		468	15.15		468	18.356
468.5	11.721		468.5	10.634		468.5	11.036		468.5	11.784		468.5	10.682		468.5	14.124		468.5	14.019		468.5	13.906		468.5	14.516		468.5	13.325		468.5	26.3		468.5	11.365		468.5	13.024		468.5	15.519		468.5	18.92
469	12.335		469	11.44		469	12.794		469	10.903		469	10.568		469	14.029		469	14.611		469	15.264		469	13.907		469	12.97		469	27.006		469	11.439		469	13.915		469	15.128		469	20.419
469.5	12.876		469.5	10.752		469.5	13.718		469.5	11.746		469.5	10.439		469.5	14.066		469.5	15.102		469.5	14.574		469.5	14.811		469.5	13.311		469.5	26.422		469.5	11.074		469.5	14.445		469.5	16.342		469.5	20.289
470	12.985		470	10.754		470	13.329		470	11.408		470	11.161		470	14.243		470	14.058		470	14.728		470	15.219		470	15.05		470	28.123		470	12.021		470	14.643		470	15.017		470	20.544
470.5	11.844		470.5	11.438		470.5	13.407		470.5	12.029		470.5	11.481		470.5	13.999		470.5	14.885		470.5	16.4		470.5	15.676		470.5	13.924		470.5	27.682		470.5	12.339		470.5	15.299		470.5	15.85		470.5	21.47
471	12.233		471	11.795		471	12.918		471	11.687		471	11.845		471	13.642		471	16.677		471	15.999		471	16.492		471	16.052		471	28.351		471	12.637		471	15.966		471	17.174		471	22.125
471.5	12.299		471.5	11.162		471.5	14.129		471.5	12.382		471.5	12.207		471.5	14.038		471.5	16.486		471.5	17.51		471.5	15.829		471.5	16.376		471.5	27.842		471.5	12.866		471.5	16.186		471.5	17.35		471.5	21.636
472	13.795		472	13.04		472	13.505		472	13.145		472	12.058		472	13.735		472	16.968		472	17.151		472	16.387		472	15.05		472	27.509		472	13.647		472	17.397		472	17.94		472	22.4
472.5	13.227		472.5	11.92		472.5	14.145		472.5	13.519		472.5	13.356		472.5	14.523		472.5	18.082		472.5	17.789		472.5	15.942		472.5	15.655		472.5	29.683		472.5	14.534		472.5	19.01		472.5	18.386		472.5	22.293
473	13.509		473	12.864		473	14.59		473	14.418		473	13.054		473	16.254		473	18.549		473	18.383		473	17.605		473	17.337		473	28.413		473	13.939		473	19.139		473	19.1		473	24.62
473.5	14.669		473.5	12.45		473.5	15.05		473.5	14.365		473.5	12.266		473.5	15.859		473.5	17.623		473.5	18.731		473.5	17.662		473.5	18.402		473.5	29.771		473.5	14.766		473.5	19.726		473.5	19.844		473.5	24.871
474	14.108		474	12.497		474	14.836		474	13.854		474	14.095		474	16.219		474	19.146		474	20.421		474	19.474		474	17.729		474	32.149		474	16.282		474	19.457		474	20.701		474	25.027
474.5	14.754		474.5	13.288		474.5	14.439		474.5	15.38		474.5	15.679		474.5	16.335		474.5	19.661		474.5	19.514		474.5	20.486		474.5	19.201		474.5	32.413		474.5	16.116		474.5	21.634		474.5	22.085		474.5	26.809
475	15.102		475	13.744		475	15.935		475	15.982		475	14.479		475	16.397		475	21.375		475	22.374		475	20.707		475	21.661		475	32.86		475	17.747		475	23.239		475	23.471		475	26.818
475.5	13.706		475.5	13.29		475.5	15.561		475.5	17.267		475.5	15.988		475.5	17.538		475.5	22.234		475.5	23.048		475.5	20.434		475.5	21.389		475.5	33.343		475.5	17.543		475.5	23.055		475.5	24.432		475.5	27.141
476	17.15		476	14.811		476	17.077		476	17.574		476	16.818		476	17.318		476	23.972		476	23.317		476	20.754		476	24.906		476	33.576		476	19.323		476	24.946		476	26.743		476	28.554
476.5	16.389		476.5	14.587		476.5	16.901		476.5	18.666		476.5	17.388		476.5	18.925		476.5	23.573		476.5	25.968		476.5	22.726		476.5	23.741		476.5	34.291		476.5	20.2		476.5	26.092		476.5	28.263		476.5	32.385
477	17.38		477	14.861		477	16.354		477	19.739		477	18.173		477	20.302		477	25.01		477	27.437		477	24.513		477	25.819		477	35.272		477	21.037		477	29.465		477	27.766		477	32.296
477.5	18.315		477.5	15.648		477.5	18.025		477.5	19.781		477.5	19.937		477.5	20.835		477.5	26.2		477.5	28.662		477.5	25.063		477.5	26.8		477.5	36.298		477.5	21.191		477.5	30.208		477.5	29.905		477.5	33.504
478	18.241		478	17.059		478	19.736		478	20.738		478	19.274		478	20.688		478	27.076		478	30.156		478	25.841		478	28.681		478	38.818		478	23.16		478	29.603		478	32.297		478	35.467
478.5	19.353		478.5	16.538		478.5	19.675		478.5	20.711		478.5	20.995		478.5	22.494		478.5	30.127		478.5	29.945		478.5	27.826		478.5	31.152		478.5	38.746		478.5	25.368		478.5	34.423		478.5	33.341		478.5	37.208
479	19.285		479	16.752		479	20.167		479	23.191		479	20.646		479	23.074		479	28.48		479	32.512		479	29.53		479	31.818		479	40.124		479	24.751		479	35.261		479	34.98		479	40.139
479.5	20.051		479.5	18.854		479.5	21.493		479.5	24.74		479.5	22.89		479.5	24.953		479.5	32.736		479.5	34.9		479.5	30.142		479.5	35.976		479.5	40.452		479.5	29.032		479.5	39.477		479.5	36.723		479.5	41.874
480	21.407		480	19.469		480	21.504		480	24.625		480	22.667		480	23.269		480	33.384		480	36.445		480	31.691		480	36.187		480	43.506		480	28.881		480	40.118		480	39.618		480	43.712
480.5	23.4		480.5	19.5		480.5	23.452		480.5	26.395		480.5	24.961		480.5	26.67		480.5	35.7		480.5	37.183		480.5	34.898		480.5	39.145		480.5	45.203		480.5	31.914		480.5	42.117		480.5	42.533		480.5	44.793
481	23.166		481	20.002		481	24.415		481	28.297		481	26.022		481	27.469		481	37.745		481	37.602		481	34.711		481	40.613		481	46.192		481	32.135		481	43.887		481	44.669		481	48.495
481.5	24.48		481.5	20.897		481.5	25.05		481.5	30.337		481.5	26.351		481.5	27.689		481.5	42.021		481.5	40.101		481.5	37.387		481.5	42.946		481.5	50.847		481.5	33.226		481.5	49.049		481.5	48.108		481.5	52.136
482	24.197		482	23.216		482	25.904		482	32.803		482	29.239		482	28.394		482	41.609		482	44.107		482	40.046		482	44.856		482	50.829		482	35.373		482	51.024		482	47.653		482	51.03
482.5	25.671		482.5	23.401		482.5	27.36		482.5	33.482		482.5	29.778		482.5	32.754		482.5	44.203		482.5	46.673		482.5	41.992		482.5	48.188		482.5	53.12		482.5	39.317		482.5	54.01		482.5	53.914		482.5	57.2
483	27.918		483	25.084		483	28.379		483	34.331		483	32.946		483	33.425		483	46.929		483	49.834		483	43.372		483	49.906		483	55.625		483	41.239		483	57.004		483	55.677		483	57.51
483.5	28.673		483.5	24.795		483.5	30.245		483.5	36.368		483.5	34.951		483.5	34.946		483.5	47.548		483.5	50.131		483.5	45.654		483.5	52.826		483.5	58.306		483.5	43.931		483.5	58.74		483.5	58.169		483.5	62.231
484	30.275		484	27.18		484	30.906		484	37.824		484	35.222		484	36.274		484	51.416		484	52.224		484	47.998		484	58.493		484	59.75		484	47.978		484	60.664		484	60.812		484	63.941
484.5	32.102		484.5	26.952		484.5	34.121		484.5	41.466		484.5	38.067		484.5	38.04		484.5	54.15		484.5	59.616		484.5	52.463		484.5	60.177		484.5	62.025		484.5	47.75		484.5	65.871		484.5	65.671		484.5	69.741
485	32.931		485	29.364		485	34.561		485	42.216		485	38.732		485	39.717		485	58.276		485	60.906		485	54.883		485	64.403		485	66.338		485	52.091		485	70.153		485	71.893		485	71.771
485.5	33.518		485.5	29.229		485.5	37.387		485.5	45.38		485.5	41.533		485.5	41.045		485.5	60.071		485.5	62.112		485.5	56.896		485.5	70.993		485.5	69.596		485.5	54.883		485.5	71.887		485.5	75.644		485.5	78.163
486	35.415		486	31.613		486	37.51		486	46.453		486	42.105		486	43.954		486	63.544		486	66.073		486	58.515		486	72.363		486	69.424		486	54.922		486	76.222		486	75.73		486	78.822
486.5	37.064		486.5	33.054		486.5	37.749		486.5	50.4		486.5	44.617		486.5	44.291		486.5	64.162		486.5	67.535		486.5	63.178		486.5	74.951		486.5	76.256		486.5	62.373		486.5	79.481		486.5	80.73		486.5	83.495
487	38.647		487	35.338		487	40.688		487	51.136		487	48.44		487	46.012		487	68.37		487	72.177		487	66.143		487	78.375		487	76.335		487	63.721		487	85.452		487	86.774		487	88.534
487.5	40.678		487.5	38.233		487.5	43.394		487.5	55.209		487.5	50.213		487.5	49.569		487.5	73.582		487.5	75.439		487.5	69.323		487.5	83.878		487.5	83.053		487.5	67.299		487.5	93.088		487.5	91.114		487.5	93.226
488	41.162		488	37.036		488	43.503		488	58.612		488	53.69		488	53.627		488	75.362		488	80.263		488	70.791		488	84.424		488	85.142		488	67.997		488	91.142		488	95.446		488	97.511
488.5	44.793		488.5	37.738		488.5	45.247		488.5	61.373		488.5	55.405		488.5	53.95		488.5	82.018		488.5	81.409		488.5	76.064		488.5	89.306		488.5	89.067		488.5	74.437		488.5	100.862		488.5	100.301		488.5	105.789
489	47.3		489	40.811		489	47.512		489	62.879		489	56.081		489	56.558		489	85.648		489	82.841		489	77.244		489	97.047		489	93.13		489	78.086		489	108.516		489	104.098		489	104.572
489.5	47.76		489.5	42.588		489.5	48.914		489.5	65.234		489.5	59.624		489.5	59.297		489.5	87.904		489.5	89.24		489.5	77.002		489.5	98.996		489.5	98.06		489.5	80.219		489.5	111.361		489.5	108.763		489.5	110.372
490	49.976		490	46.531		490	51.613		490	68.324		490	62.38		490	64.017		490	92.368		490	94.201		490	85.816		490	104.821		490	101.245		490	85.086		490	117.432		490	119.644		490	120.518
490.5	50.998		490.5	47.459		490.5	54.436		490.5	73.459		490.5	67.078		490.5	65.254		490.5	95.222		490.5	100.285		490.5	91.811		490.5	110.647		490.5	104.174		490.5	88.953		490.5	123.809		490.5	124.294		490.5	124.388
491	54.104		491	49.495		491	56.483		491	76.854		491	70.102		491	67.607		491	101.04		491	105.853		491	95.41		491	116.597		491	110.266		491	93.207		491	130.039		491	128.238		491	126.023
491.5	57.221		491.5	50.554		491.5	59.784		491.5	78.708		491.5	70.935		491.5	68.868		491.5	104.48		491.5	107.222		491.5	96.806		491.5	121.125		491.5	115.657		491.5	97.504		491.5	137.279		491.5	135.151		491.5	135.223
492	56.598		492	52.513		492	60.795		492	82.908		492	74.749		492	72.736		492	108.696		492	110.381		492	100.751		492	128.464		492	118.344		492	102.116		492	140.523		492	137.614		492	136.675
492.5	61.461		492.5	54.508		492.5	62.655		492.5	86.135		492.5	77.715		492.5	78.568		492.5	114.468		492.5	118.338		492.5	106.239		492.5	133.864		492.5	124.201		492.5	110.594		492.5	150.995		492.5	145.673		492.5	146.975
493	64.237		493	57.254		493	67.907		493	89.779		493	81.483		493	78.681		493	118.861		493	123.169		493	110.366		493	139.134		493	129.992		493	112.449		493	152.139		493	157.943		493	152.68
493.5	65.617		493.5	60.383		493.5	68.529		493.5	93.103		493.5	88.886		493.5	85.942		493.5	125.616		493.5	128.667		493.5	121.697		493.5	146.034		493.5	134.703		493.5	120.116		493.5	162.111		493.5	161.932		493.5	161.632
494	65.514		494	60.954		494	70.019		494	96.733		494	87.862		494	84.149		494	126.618		494	132.536		494	123.885		494	143.906		494	141.736		494	121.383		494	164.562		494	168.565		494	164.76
494.5	69.074		494.5	64.877		494.5	74.099		494.5	98.685		494.5	91.582		494.5	92.637		494.5	132.187		494.5	134.18		494.5	124.378		494.5	154.279		494.5	149.117		494.5	129.321		494.5	179.993		494.5	175.204		494.5	171.038
495	70.723		495	66.172		495	74.001		495	101.878		495	94.81		495	92.288		495	134.206		495	140.544		495	130.858		495	159.639		495	149.758		495	134.325		495	181.164		495	178.428		495	175.616
495.5	73.055		495.5	69.454		495.5	78.413		495.5	107.484		495.5	99.27		495.5	98.035		495.5	143.659		495.5	145.837		495.5	135.034		495.5	165.947		495.5	155.875		495.5	142.411		495.5	192.861		495.5	187.1		495.5	183.989
496	75.547		496	71.215		496	80.856		496	113.456		496	104.311		496	99.588		496	148.734		496	150.715		496	138.282		496	171.26		496	158.747		496	145.354		496	193.542		496	191.578		496	184.434
496.5	77.461		496.5	73.547		496.5	78.921		496.5	115.233		496.5	109.328		496.5	102.866		496.5	146.878		496.5	154.584		496.5	140.936		496.5	173.761		496.5	166.533		496.5	147.86		496.5	202.259		496.5	201.758		496.5	196.01
497	81.776		497	76.438		497	85.888		497	115.115		497	111.553		497	107.255		497	156.788		497	157.49		497	142.03		497	179.692		497	175.918		497	153.625		497	210.749		497	203.784		497	200.643
497.5	82.604		497.5	78.007		497.5	82.25		497.5	120.875		497.5	111.553		497.5	108.334		497.5	161.922		497.5	161.762		497.5	150.462		497.5	186.314		497.5	178.995		497.5	158.994		497.5	212.076		497.5	212.602		497.5	215.727
498	86.688		498	80.127		498	88.437		498	122.743		498	113.916		498	114.692		498	166.587		498	162.789		498	151.528		498	196.046		498	184.923		498	171.29		498	224.35		498	220.664		498	220.067
498.5	87.706		498.5	83.319		498.5	91.836		498.5	128.364		498.5	117.536		498.5	117.657		498.5	167.293		498.5	171.486		498.5	163.123		498.5	196.195		498.5	192.287		498.5	169.899		498.5	233.298		498.5	229.972		498.5	221.421
499	89.159		499	83.724		499	92.34		499	130.397		499	125.27		499	118.109		499	170.092		499	173.823		499	163.572		499	203.287		499	194.179		499	173.341		499	238.607		499	236.722		499	228.505
499.5	91.86		499.5	87.206		499.5	96.891		499.5	137.49		499.5	124.733		499.5	122.253		499.5	178.028		499.5	180.294		499.5	166.996		499.5	208.078		499.5	198.327		499.5	181.838		499.5	245.883		499.5	245.017		499.5	238.74
500	94.877		500	89.7		500	98.339		500	138.089		500	127.919		500	125.43		500	179.945		500	187.105		500	171.172		500	213.612		500	209.852		500	184.179		500	249.047		500	245.417		500	242.209
500.5	97.864		500.5	94.421		500.5	100.519		500.5	141.435		500.5	132.208		500.5	130.626		500.5	187.429		500.5	187.504		500.5	166.436		500.5	221.095		500.5	214.603		500.5	195.296		500.5	256.457		500.5	258.589		500.5	251.096
501	96.013		501	92.529		501	101.414		501	144.286		501	135.412		501	132.112		501	188.033		501	190.174		501	179.703		501	223.272		501	217.683		501	197.384		501	259.875		501	262.549		501	254.22
501.5	98.134		501.5	95.874		501.5	105.982		501.5	150.074		501.5	140.053		501.5	135.669		501.5	190.332		501.5	197.87		501.5	186.508		501.5	231.337		501.5	227.87		501.5	204.217		501.5	268.626		501.5	270.693		501.5	263.012
502	100.872		502	95.374		502	104.737		502	150.321		502	143.501		502	133.113		502	195.67		502	202.206		502	186.565		502	231.71		502	227.148		502	204.538		502	279.169		502	274.541		502	264.626
502.5	103.682		502.5	98.781		502.5	106.646		502.5	158.2		502.5	144.878		502.5	140.347		502.5	200.78		502.5	203.314		502.5	191.579		502.5	237.101		502.5	234.384		502.5	212.28		502.5	282.318		502.5	281.546		502.5	271.604
503	105.271		503	99.177		503	108.018		503	151.856		503	144.515		503	142.809		503	205.794		503	204.484		503	193.591		503	238.262		503	241.465		503	216.058		503	290.654		503	287.541		503	273.689
503.5	107.971		503.5	101.3		503.5	110.907		503.5	157.855		503.5	149.798		503.5	141.673		503.5	204.728		503.5	208.023		503.5	197.491		503.5	240.005		503.5	238.151		503.5	220.017		503.5	287.956		503.5	287.838		503.5	281.14
504	111.108		504	104.003		504	109.915		504	162.246		504	150.333		504	150.558		504	207.903		504	213.315		504	196.79		504	250.559		504	253.962		504	222.214		504	290.551		504	292.987		504	288.852
504.5	108.842		504.5	108.105		504.5	113.516		504.5	157.968		504.5	155.119		504.5	150.293		504.5	212.006		504.5	215.122		504.5	200.591		504.5	246.302		504.5	252.463		504.5	227.962		504.5	298.87		504.5	303.224		504.5	287.203
505	109.306		505	106.385		505	117.885		505	165.255		505	153.806		505	152.724		505	214.301		505	215.411		505	208.472		505	254.908		505	259.895		505	233.018		505	301.352		505	304.193		505	295.513
505.5	112.506		505.5	108.387		505.5	115.404		505.5	163.92		505.5	159.803		505.5	153.557		505.5	220.28		505.5	219.804		505.5	207.601		505.5	255.648		505.5	265.916		505.5	232.366		505.5	306.805		505.5	310.748		505.5	302.489
506	109.766		506	106.284		506	118.294		506	166.389		506	157.917		506	155.825		506	220.128		506	218.834		506	208.706		506	260.396		506	266.598		506	242.074		506	318.265		506	315.563		506	299.813
506.5	113.064		506.5	110.585		506.5	120.996		506.5	171.198		506.5	164.022		506.5	155.548		506.5	223.42		506.5	220.112		506.5	207.601		506.5	264.337		506.5	264.095		506.5	243.629		506.5	317.074		506.5	317.365		506.5	306.013
507	112.152		507	111.039		507	116.384		507	170.068		507	163.044		507	160.433		507	225.457		507	224.772		507	209.571		507	263.06		507	270.817		507	247.275		507	316.503		507	323.584		507	307.734
507.5	114.952		507.5	111.369		507.5	121.043		507.5	171.906		507.5	164.957		507.5	157.682		507.5	221.042		507.5	227.933		507.5	213.054		507.5	267.368		507.5	272.068		507.5	250.523		507.5	320.762		507.5	325.36		507.5	312.126
508	115.983		508	113.422		508	119.015		508	171.989		508	168.555		508	161.654		508	230.622		508	225.628		508	214.277		508	271.499		508	275.865		508	252.865		508	325.105		508	326.043		508	313.031
508.5	117.458		508.5	114.764		508.5	119.311		508.5	177.723		508.5	167.035		508.5	163.543		508.5	230.484		508.5	225.48		508.5	217.444		508.5	267.928		508.5	278.77		508.5	255.94		508.5	326.923		508.5	329.63		508.5	318.995
509	118.413		509	112.542		509	120.404		509	179.655		509	167.769		509	164.351		509	229.93		509	232.769		509	215.058		509	270.72		509	280.002		509	253.331		509	323.738		509	331.327		509	318.615
509.5	118.19		509.5	112.118		509.5	120.606		509.5	177.139		509.5	164.201		509.5	167.202		509.5	231.68		509.5	223.403		509.5	223.83		509.5	274.437		509.5	284.639		509.5	252.492		509.5	324.682		509.5	331.648		509.5	320.687
510	113.471		510	118.344		510	121.003		510	175.22		510	169.015		510	165.222		510	227.945		510	231.451		510	226.597		510	270.458		510	287.451		510	260.527		510	337.508		510	335.904		510	325.406
510.5	118.273		510.5	115.794		510.5	121.623		510.5	177.007		510.5	172.814		510.5	163.38		510.5	229.351		510.5	231.825		510.5	221.312		510.5	271.083		510.5	282.642		510.5	262.762		510.5	334.63		510.5	337.876		510.5	321.816
511	116.525		511	115.91		511	120.345		511	177.542		511	167.332		511	167.963		511	230.205		511	226.942		511	218.791		511	279.371		511	287.461		511	264.171		511	337.997		511	338.134		511	329.894
511.5	117.615		511.5	112.438		511.5	121.315		511.5	177.476		511.5	167.582		511.5	166.495		511.5	226.881		511.5	230.458		511.5	220.893		511.5	277.493		511.5	285.578		511.5	262.988		511.5	333.3		511.5	334.964		511.5	324.092
512	117.756		512	118.673		512	121.365		512	178.436		512	167.569		512	166.203		512	227.533		512	227.659		512	217.392		512	271.363		512	287.344		512	265.458		512	337.508		512	342.294		512	324.913
512.5	117.175		512.5	115.559		512.5	123.734		512.5	175.693		512.5	170.668		512.5	168.651		512.5	229.521		512.5	233.975		512.5	217.782		512.5	269.409		512.5	290.448		512.5	267.302		512.5	327.422		512.5	343.663		512.5	321.944
513	117.389		513	116.29		513	120.504		513	176.745		513	170.781		513	165.747		513	223.258		513	226.69		513	220.146		513	267.757		513	288.282		513	270.05		513	332.76		513	338.264		513	322.193
513.5	116.496		513.5	115.471		513.5	117.895		513.5	176.085		513.5	170.435		513.5	170.129		513.5	222.442		513.5	224.602		513.5	217.392		513.5	267.443		513.5	287.601		513.5	265.378		513.5	336.006		513.5	338.603		513.5	319.3
514	119.311		514	113.911		514	114.67		514	174.477		514	167.216		514	172.911		514	229.299		514	220.836		514	220.259		514	268.55		514	284.675		514	260.527		514	333.409		514	338.77		514	319.265
514.5	114.723		514.5	114.128		514.5	118.267		514.5	173.263		514.5	170.119		514.5	165.91		514.5	220.446		514.5	224.594		514.5	213.63		514.5	262.222		514.5	287.9		514.5	263.282		514.5	332.863		514.5	336.879		514.5	324.84
515	115.097		515	112.805		515	118.755		515	176.607		515	166.147		515	167.276		515	226.052		515	220.277		515	212.537		515	258.5		515	289.042		515	261.137		515	327.306		515	333.248		515	318.88
515.5	112.599		515.5	112.064		515.5	114.936		515.5	172.654		515.5	167.608		515.5	162.616		515.5	221.449		515.5	213.875		515.5	208.006		515.5	260.333		515.5	286.061		515.5	258.777		515.5	328.023		515.5	333.662		515.5	314.514
516	113.321		516	110.959		516	117.508		516	171.123		516	167.079		516	160.421		516	218.359		516	217.97		516	203.975		516	255.383		516	286.337		516	260.092		516	326.483		516	327.893		516	313.192
516.5	110.4		516.5	110.219		516.5	115.83		516.5	168.41		516.5	158.982		516.5	161.215		516.5	214.332		516.5	216.789		516.5	205.181		516.5	258.838		516.5	282.272		516.5	260.204		516.5	320.146		516.5	325.017		516.5	312.046
517	109.02		517	109.848		517	114.538		517	168.41		517	165.991		517	160.901		517	210.885		517	210.306		517	202.403		517	253.121		517	283.289		517	257.47		517	316.721		517	322.673		517	309.251
517.5	108.775		517.5	110.924		517.5	110.957		517.5	166.305		517.5	162.057		517.5	157.595		517.5	205.34		517.5	211.633		517.5	202.769		517.5	247.468		517.5	282.862		517.5	250.222		517.5	317.829		517.5	318.035		517.5	305.043
518	111.107		518	106.954		518	110.303		518	162.829		518	158.985		518	159.716		518	212.478		518	204.617		518	198.224		518	253.272		518	276.188		518	254.997		518	314.577		518	323.257		518	302.228
518.5	108.808		518.5	110.446		518.5	111.175		518.5	161.402		518.5	157.695		518.5	158.03		518.5	199.963		518.5	203.854		518.5	196.508		518.5	244.365		518.5	279.754		518.5	249.596		518.5	307.703		518.5	315.875		518.5	299.768
519	107.942		519	104.099		519	107.541		519	159.686		519	155.054		519	154.482		519	200.398		519	199.131		519	191.816		519	237.037		519	272.341		519	249.048		519	300.692		519	310.895		519	296.525
519.5	102.188		519.5	102.291		519.5	105.69		519.5	154.887		519.5	155.715		519.5	153.49		519.5	194.35		519.5	196.285		519.5	194.296		519.5	233.193		519.5	270.645		519.5	244.705		519.5	300.578		519.5	306.257		519.5	290.88
520	102.607		520	101.381		520	104.545		520	153.612		520	152.447		520	153.737		520	192.812		520	189.909		520	188.529		520	231.093		520	268.916		520	244.244		520	300.873		520	300.932		520	292.806
520.5	101.097		520.5	102.32		520.5	104.844		520.5	152.214		520.5	146.084		520.5	148.459		520.5	191.454		520.5	189.107		520.5	188.748		520.5	232.115		520.5	264.814		520.5	239.928		520.5	299.927		520.5	295.777		520.5	283.122
521	99.241		521	99.385		521	103.268		521	149.013		521	147.487		521	146.134		521	189.297		521	182.418		521	180.992		521	223.28		521	261.085		521	233.868		521	292.828		521	296.129		521	281.609
521.5	98.502		521.5	97.228		521.5	101.158		521.5	147.581		521.5	145.708		521.5	143.235		521.5	189.625		521.5	188.296		521.5	180.051		521.5	220.73		521.5	261.005		521.5	231.473		521.5	286.137		521.5	290.562		521.5	278.625
522	95.806		522	96.786		522	97.268		522	141.133		522	139.514		522	138.692		522	180.308		522	178.909		522	176.175		522	216.789		522	256.706		522	222.372		522	272.546		522	288.4		522	273.021
522.5	96.304		522.5	96.173		522.5	97.189		522.5	136.759		522.5	137.239		522.5	141.928		522.5	177.072		522.5	176.493		522.5	171.946		522.5	210.061		522.5	249.739		522.5	221.701		522.5	275.048		522.5	275.623		522.5	265.338
523	92.016		523	94.017		523	93.794		523	137.993		523	134.845		523	137.051		523	171.531		523	168.595		523	169.139		523	202.919		523	245.517		523	219.637		523	269.738		523	281.916		523	261.933
523.5	90.28		523.5	92.355		523.5	91.432		523.5	133.578		523.5	134.443		523.5	135.723		523.5	172.846		523.5	167.777		523.5	163.432		523.5	204.188		523.5	242.62		523.5	217.49		523.5	263.767		523.5	266.593		523.5	254.47
524	87.942		524	89.122		524	88.749		524	133.262		524	133.184		524	131.117		524	164.798		524	167.272		524	162.091		524	197.28		524	236.707		524	211.342		524	262.302		524	261.19		524	251.491
524.5	87.712		524.5	88.524		524.5	87.544		524.5	128.375		524.5	124.755		524.5	129.88		524.5	162.741		524.5	165.04		524.5	154.949		524.5	192.843		524.5	233.075		524.5	208.851		524.5	254.137		524.5	259.427		524.5	244.359
525	83.367		525	86.115		525	87.665		525	125.569		525	127.135		525	127.255		525	161.612		525	158.144		525	154.636		525	189.351		525	231.278		525	208.465		525	249.468		525	253.623		525	240.628
525.5	81.41		525.5	82.836		525.5	87.439		525.5	124.201		525.5	125.273		525.5	124.849		525.5	155.468		525.5	152.265		525.5	153.251		525.5	182.831		525.5	227.016		525.5	200.257		525.5	240.972		525.5	252.166		525.5	236.483
526	83.142		526	82.846		526	82.238		526	124.218		526	120.038		526	125.226		526	154.005		526	152.181		526	150.121		526	188.188		526	227.148		526	201.855		526	240.156		526	246.28		526	231.719
526.5	79.727		526.5	83.244		526.5	81.929		526.5	119.345		526.5	116.086		526.5	119.937		526.5	150.251		526.5	149.298		526.5	143.285		526.5	181.202		526.5	218.89		526.5	194.321		526.5	235.949		526.5	240.331		526.5	225.88
527	78.476		527	78.826		527	79.081		527	115.768		527	114.825		527	117.092		527	146.73		527	141.712		527	139.544		527	174.032		527	212.378		527	188.017		527	230.679		527	236.657		527	225.611
527.5	73.334		527.5	78.58		527.5	76.141		527.5	112.648		527.5	117.363		527.5	113.369		527.5	142.013		527.5	139.38		527.5	134.662		527.5	170		527.5	208.043		527.5	186.042		527.5	222.654		527.5	226.093		527.5	217.544
528	75.031		528	77.063		528	75.654		528	110.959		528	109.089		528	110.505		528	140.053		528	136.994		528	137.858		528	172.343		528	204.994		528	179.286		528	219.571		528	224.621		528	213.191
528.5	71.759		528.5	75.528		528.5	74.957		528.5	111.938		528.5	109.19		528.5	107.754		528.5	134.237		528.5	134.569		528.5	131.242		528.5	156.06		528.5	197.354		528.5	177.19		528.5	215.888		528.5	218.835		528.5	205.311
529	72.209		529	71.765		529	71.797		529	103.698		529	104.324		529	108.653		529	134.117		529	127.974		529	130.193		529	155.784		529	195.577		529	176.054		529	211.402		529	217.816		529	201.642
529.5	68.05		529.5	71.269		529.5	67.89		529.5	102.656		529.5	102.165		529.5	105.797		529.5	132.24		529.5	125.279		529.5	123.355		529.5	150.778		529.5	190.417		529.5	171.156		529.5	204.052		529.5	207.24		529.5	194.05
530	67.301		530	66.861		530	65.733		530	98.406		530	101.248		530	101.708		530	125.43		530	123.436		530	120.705		530	140.786		530	182.007		530	164.889		530	191.95		530	205.315		530	194.326
530.5	62.154		530.5	68.467		530.5	65.552		530.5	96.876		530.5	98.054		530.5	96.988		530.5	122.192		530.5	119.084		530.5	118.572		530.5	142.515		530.5	181.309		530.5	160.877		530.5	191.354		530.5	198.016		530.5	186.398
531	62.442		531	65.709		531	65.638		531	96.138		531	92.624		531	96.151		531	119.699		531	115.264		531	113.633		531	140.465		531	178.698		531	157.772		531	186.418		531	190.381		531	179.685
531.5	62.446		531.5	63.029		531.5	60.032		531.5	93.891		531.5	91.384		531.5	93.75		531.5	115.024		531.5	110.584		531.5	110.371		531.5	135.43		531.5	170.861		531.5	152.239		531.5	182.412		531.5	186.032		531.5	175.357
532	56.735		532	63.318		532	59.87		532	93.111		532	92.643		532	94.311		532	109.766		532	110.402		532	106.395		532	129.802		532	164.512		532	151.352		532	176.247		532	181.625		532	173.863
532.5	57.917		532.5	62.604		532.5	58.72		532.5	87.868		532.5	88.374		532.5	92.071		532.5	111.551		532.5	105.345		532.5	107.597		532.5	127.608		532.5	169.628		532.5	146.241		532.5	175.916		532.5	173.524		532.5	169.982
533	56.025		533	58.536		533	57.995		533	86.484		533	84.951		533	87.12		533	104.352		533	106.386		533	105.078		533	122.558		533	161.344		533	143.034		533	166.92		533	174.638		533	162.725
533.5	56.163		533.5	57.26		533.5	57.94		533.5	82.519		533.5	84.636		533.5	85.798		533.5	102.786		533.5	101.309		533.5	96.786		533.5	121.784		533.5	159.498		533.5	141.65		533.5	166.179		533.5	168.019		533.5	157.444
534	53.189		534	54.8		534	53.093		534	79.617		534	79.605		534	79.286		534	97.685		534	94.98		534	97.071		534	114.091		534	150.67		534	134.171		534	159.336		534	163.082		534	153.296
534.5	50.551		534.5	54.617		534.5	51.724		534.5	75.835		534.5	77.461		534.5	79.041		534.5	94.968		534.5	94.25		534.5	91.271		534.5	110.665		534.5	149.328		534.5	131.548		534.5	157.267		534.5	153.806		534.5	147.159
535	48.617		535	51.777		535	50.972		535	75.348		535	76.348		535	78.232		535	94.925		535	90.316		535	88.363		535	108.032		535	144.636		535	128.906		535	149.089		535	152.922		535	148.068
535.5	48.901		535.5	51.047		535.5	47.569		535.5	71.571		535.5	72.542		535.5	75.515		535.5	90.05		535.5	87.355		535.5	88.859		535.5	105.379		535.5	138.887		535.5	127.191		535.5	143.282		535.5	144.19		535.5	139.382
536	46.95		536	48.324		536	47.757		536	69.301		536	70.405		536	69.499		536	86.688		536	84.233		536	84.607		536	100.336		536	136.037		536	116.375		536	138.458		536	145.278		536	136.428
536.5	46.137		536.5	46.227		536.5	46.131		536.5	65.226		536.5	68.368		536.5	71.318		536.5	83.853		536.5	79.416		536.5	80.203		536.5	95.091		536.5	131.309		536.5	114.884		536.5	132.015		536.5	136.318		536.5	128.483
537	43.976		537	46.351		537	44.31		537	65.218		537	63.247		537	67.491		537	82.555		537	78.148		537	78.745		537	92.889		537	127.694		537	112.626		537	128.327		537	134.068		537	128.862
537.5	42.932		537.5	44.526		537.5	44.487		537.5	62.908		537.5	62.276		537.5	63.387		537.5	79.531		537.5	76.359		537.5	78.351		537.5	88.43		537.5	121.175		537.5	107.813		537.5	125.529		537.5	127.494		537.5	124.71
538	41.609		538	42.103		538	42.437		538	61.962		538	62.595		538	63.49		538	75.58		538	73.562		538	72.102		538	87.022		538	121.812		538	98.256		538	123.018		538	119.896		538	118.361
538.5	37.943		538.5	41.646		538.5	38.943		538.5	61.236		538.5	60.052		538.5	60.29		538.5	73.26		538.5	71.21		538.5	72.32		538.5	84.378		538.5	111.372		538.5	98.442		538.5	116.297		538.5	119.62		538.5	114.095
539	38.146		539	40.833		539	39.212		539	58.014		539	58.378		539	61.333		539	71.243		539	68.169		539	68.12		539	81.96		539	111.106		539	97.391		539	114.024		539	115.293		539	110.366
539.5	35.925		539.5	38.695		539.5	37.56		539.5	54.076		539.5	53.996		539.5	58.462		539.5	67.614		539.5	65.031		539.5	66.15		539.5	78.505		539.5	105.408		539.5	94.128		539.5	104.684		539.5	110.331		539.5	107.555
540	36.837		540	39.396		540	35.233		540	53.449		540	54.04		540	56.469		540	67.84		540	65.075		540	65.39		540	77.179		540	106.023		540	93.299		540	112.209		540	108.264		540	104.704
540.5	35.602		540.5	37.486		540.5	34.527		540.5	50.143		540.5	52.891		540.5	53.876		540.5	62.896		540.5	61.445		540.5	62.112		540.5	71.875		540.5	101.568		540.5	88.039		540.5	101.598		540.5	106.318		540.5	100.368
541	34.494		541	35.992		541	33.632		541	50.642		541	48.246		541	53.247		541	60.891		541	60.207		541	57.212		541	72.65		541	98.258		541	85.485		541	98.322		541	99.978		541	98.023
541.5	32.355		541.5	32.762		541.5	29.997		541.5	47.727		541.5	47.733		541.5	50.761		541.5	57.596		541.5	56.144		541.5	56.735		541.5	68.855		541.5	93.726		541.5	81.838		541.5	94.273		541.5	95.766		541.5	92.098
542	29.678		542	33.597		542	30.795		542	47.653		542	45.33		542	49.929		542	58.572		542	55.298		542	55.627		542	65.514		542	91.845		542	80.432		542	92.043		542	94.12		542	90.715
542.5	29.06		542.5	32.551		542.5	29.986		542.5	42.445		542.5	44.952		542.5	47.191		542.5	51.745		542.5	54.113		542.5	53.914		542.5	62.421		542.5	87.425		542.5	77.177		542.5	88.94		542.5	90.216		542.5	86.965
543	28.389		543	30.323		543	29.322		543	42.793		543	42.343		543	45.075		543	52.529		543	51.394		543	50.684		543	60.738		543	84.234		543	74.173		543	85.377		543	88.917		543	83.142
543.5	28.214		543.5	29.721		543.5	26.583		543.5	40.065		543.5	41.231		543.5	42.655		543.5	50.211		543.5	49.372		543.5	50.14		543.5	58.69		543.5	81.529		543.5	71.793		543.5	81.454		543.5	83.635		543.5	80.753
544	27.324		544	28.219		544	28.523		544	40.097		544	40.471		544	42.455		544	51.348		544	46.785		544	46.505		544	58.497		544	79.896		544	67.435		544	80.922		544	85.382		544	78.964
544.5	27.695		544.5	26.119		544.5	26.231		544.5	37.543		544.5	37.172		544.5	40.94		544.5	48.223		544.5	45.432		544.5	46.009		544.5	54.812		544.5	77.728		544.5	66.065		544.5	75.888		544.5	77.133		544.5	74.251
545	25.5		545	26.307		545	26.118		545	37.314		545	38.525		545	40.143		545	45.096		545	43.765		545	43.602		545	51.549		545	74.689		545	63.365		545	71.088		545	78.676		545	72.915
545.5	24.699		545.5	25.656		545.5	25.353		545.5	33.789		545.5	36.298		545.5	40.118		545.5	43.66		545.5	42.351		545.5	42.872		545.5	50.375		545.5	72.716		545.5	63.098		545.5	69.377		545.5	72.372		545.5	68.986
546	22.651		546	25.316		546	23.206		546	34.913		546	33.355		546	36.06		546	40.907		546	40.192		546	39.849		546	46.282		546	70.739		546	57.336		546	65.371		546	70.12		546	68.275
546.5	22.783		546.5	24.748		546.5	22.455		546.5	32.719		546.5	33.107		546.5	35.104		546.5	40.847		546.5	38.503		546.5	39.027		546.5	46.079		546.5	67.275		546.5	58.799		546.5	62.234		546.5	65.076		546.5	62.316
547	22.733		547	23.087		547	21.985		547	32.018		547	30.926		547	34.991		547	38.834		547	38.452		547	37.997		547	44.444		547	62.874		547	55.837		547	61.369		547	64.86		547	63.412
547.5	21.926		547.5	22.325		547.5	20.966		547.5	30.747		547.5	30.213		547.5	32.132		547.5	38.061		547.5	36.066		547.5	35.916		547.5	43.396		547.5	63.843		547.5	54.095		547.5	60.651		547.5	61.37		547.5	60.408
548	19.798		548	20.174		548	20.639		548	30.691		548	29.837		548	31.434		548	37.135		548	35.058		548	34.533		548	41.665		548	60.604		548	50.736		548	56.004		548	59.37		548	56.913
548.5	18.854		548.5	21.27		548.5	19.636		548.5	28.445		548.5	27.564		548.5	31.522		548.5	33.754		548.5	31.581		548.5	32.524		548.5	38.244		548.5	56.755		548.5	49.062		548.5	55.44		548.5	57.217		548.5	52.519
549	18.505		549	20.378		549	17.822		549	28.101		549	28.809		549	28.688		549	32.064		549	35.428		549	33.723		549	37.656		549	54.723		549	48.21		549	51.802		549	55.535		549	53.902
549.5	18.119		549.5	20.074		549.5	18.801		549.5	26.029		549.5	25.7		549.5	27.912		549.5	32.831		549.5	30.453		549.5	29.887		549.5	36.567		549.5	51.732		549.5	46.116		549.5	50.396		549.5	53.297		549.5	49.995
550	17.374		550	18.618		550	17.893		550	25.841		550	25.408		550	27.584		550	32.102		550	31.786		550	30.447		550	35.874		550	52.429		550	44.314		550	49.059		550	50.642		550	49.486
550.5	16.165		550.5	17.991		550.5	17.009		550.5	23.494		550.5	24.594		550.5	26.186		550.5	29.111		550.5	28.29		550.5	29.175		550.5	31.828		550.5	47.674		550.5	41.822		550.5	45.831		550.5	48.041		550.5	50.054
551	15.953		551	17.727		551	16.423		551	23.491		551	24.307		551	25.679		551	27.892		551	26.419		551	27.959		551	32.827		551	47.306		551	41.131		551	45.781		551	48.016		551	46.3
551.5	15.961		551.5	17.102		551.5	15.174		551.5	21.698		551.5	23.268		551.5	24.505		551.5	27.282		551.5	26.785		551.5	26.055		551.5	31.312		551.5	46.85		551.5	38.322		551.5	42.47		551.5	46.549		551.5	43.958
552	16.23		552	16.821		552	15.722		552	21.628		552	22.745		552	23.712		552	27.475		552	26.073		552	25.813		552	31.549		552	46.462		552	39.016		552	42.997		552	45.353		552	43.03
552.5	14.235		552.5	14.379		552.5	14.974		552.5	20.921		552.5	20.952		552.5	21.392		552.5	25.323		552.5	24.596		552.5	25.677		552.5	27.739		552.5	43.014		552.5	35.671		552.5	41.265		552.5	43.275		552.5	39.565
553	14.687		553	15.208		553	16.4		553	20.042		553	20.088		553	21.128		553	25.063		553	24.068		553	24.359		553	26.805		553	40.351		553	35.126		553	39.84		553	41.947		553	39.782
553.5	14.264		553.5	14.191		553.5	13.279		553.5	19.178		553.5	19.477		553.5	21.275		553.5	23.553		553.5	23.326		553.5	22.597		553.5	26.391		553.5	39.281		553.5	33.937		553.5	36.676		553.5	38.901		553.5	38.086
554	13.722		554	13.925		554	13.089		554	17.699		554	18.699		554	20.928		554	21.143		554	22.041		554	21.595		554	24.008		554	37.331		554	32.55		554	35.778		554	38.251		554	36.628
554.5	12.81		554.5	13.722		554.5	12.452		554.5	17.734		554.5	18.936		554.5	20.04		554.5	22.415		554.5	21.858		554.5	22.277		554.5	24.569		554.5	37.016		554.5	30.547		554.5	33.599		554.5	36.399		554.5	33.72
555	12.471		555	12.713		555	12.238		555	17.921		555	18.418		555	19.471		555	21.841		555	21.12		555	20.529		555	24.112		555	37.981		555	29.857		555	33.89		555	34.946		555	33.794
555.5	11.818		555.5	12.632		555.5	12.142		555.5	18.452		555.5	17.154		555.5	19.017		555.5	20.73		555.5	19.488		555.5	20.026		555.5	23.367		555.5	33.801		555.5	29.123		555.5	31.839		555.5	34.132		555.5	32.749
556	12.164		556	12.579		556	11.705		556	16.735		556	16.641		556	16.131		556	19.537		556	18.869		556	20.433		556	21.407		556	32.97		556	26.733		556	31.208		556	32.865		556	31.924
556.5	11.309		556.5	13.162		556.5	10.684		556.5	16.307		556.5	15.98		556.5	17.747		556.5	19.187		556.5	18.838		556.5	19.34		556.5	21.754		556.5	34.164		556.5	27.138		556.5	30.457		556.5	32.251		556.5	30.47
557	10.804		557	12.523		557	11.114		557	15.573		557	16.47		557	16.792		557	18.538		557	15.957		557	18.53		557	21.382		557	31.642		557	26.519		557	30.185		557	30.085		557	30.705
557.5	11.108		557.5	11.645		557.5	10.847		557.5	15.317		557.5	14.054		557.5	16.745		557.5	17.939		557.5	17.652		557.5	17.872		557.5	21.889		557.5	30.546		557.5	26.59		557.5	28.634		557.5	28.655		557.5	28.943
558	9.552		558	10.199		558	10.533		558	14.33		558	14.612		558	15.161		558	16.734		558	17.721		558	17.591		558	18.679		558	30.33		558	23.82		558	26.368		558	28.175		558	27.924
558.5	9.889		558.5	11.063		558.5	9.935		558.5	14.076		558.5	13.899		558.5	15.28		558.5	16.9		558.5	16.209		558.5	16.379		558.5	19.193		558.5	28.459		558.5	22.928		558.5	24.606		558.5	26.993		558.5	26.434
559	9.759		559	10.437		559	9.293		559	12.506		559	12.319		559	15.276		559	16.229		559	16.222		559	16.609		559	18.035		559	27.088		559	22.474		559	24.372		559	26.919		559	25.807
559.5	9.236		559.5	10.237		559.5	9.537		559.5	12.919		559.5	13.3		559.5	15.063		559.5	16.023		559.5	15.087		559.5	15.992		559.5	17.194		559.5	26.845		559.5	22.674		559.5	23.982		559.5	25.008		559.5	24.777
560	8.291		560	10.038		560	9.413		560	12.197		560	12.862		560	13.753		560	15.829		560	16.147		560	14.856		560	16.734		560	25.311		560	19.885		560	22.278		560	24.139		560	24.386
560.5	8.842		560.5	9.842		560.5	7.326		560.5	11.691		560.5	11.222		560.5	12.943		560.5	13.812		560.5	14.056		560.5	14.792		560.5	15.55		560.5	24.404		560.5	20.062		560.5	23.15		560.5	22.726		560.5	22.891
561	8.451		561	9.261		561	8.668		561	12.26		561	10.345		561	12.553		561	13.811		561	13.012		561	13.389		561	14.963		561	23.45		561	20.28		561	21.948		561	23.023		561	22.534
561.5	7.864		561.5	8.719		561.5	8.009		561.5	10.389		561.5	11.14		561.5	11.701		561.5	13.134		561.5	12.431		561.5	12.852		561.5	13.926		561.5	22.674		561.5	18.592		561.5	20.362		561.5	21.562		561.5	21.439
562	7.922		562	8.213		562	7.688		562	11.601		562	10.919		562	12.79		562	12.743		562	13.093		562	12.467		562	13.568		562	23.115		562	18.198		562	21.422		562	21.343		562	21.007
562.5	7.876		562.5	8.117		562.5	7.92		562.5	11.023		562.5	10.936		562.5	11.383		562.5	12.615		562.5	12.302		562.5	12.496		562.5	13.436		562.5	21.899		562.5	18.167		562.5	20.245		562.5	20.703		562.5	19.137
563	6.987		563	7.494		563	7.918		563	10.655		563	10.066		563	11.725		563	12.142		563	12.322		563	11.681		563	13.414		563	20.191		563	17.24		563	18.65		563	20.704		563	18.238
563.5	7.542		563.5	7.656		563.5	7.098		563.5	8.996		563.5	9.562		563.5	11.314		563.5	11.665		563.5	11.106		563.5	12.271		563.5	13.409		563.5	19.363		563.5	15.649		563.5	17.684		563.5	18.975		563.5	18.554
564	7.018		564	7.553		564	7.067		564	10.286		564	9.748		564	11.306		564	11.174		564	10.456		564	10.817		564	12.015		564	19.455		564	16.282		564	18.461		564	18.695		564	17.635
564.5	6.948		564.5	7.089		564.5	7.307		564.5	8.816		564.5	8.053		564.5	10.34		564.5	11.862		564.5	11.066		564.5	11.627		564.5	11.604		564.5	18.014		564.5	15.042		564.5	17.295		564.5	18.575		564.5	18.384
565	6.653		565	6.944		565	6.35		565	8.52		565	8.743		565	10.011		565	10.611		565	10.025		565	11.382		565	11.714		565	18.621		565	14.82		565	16.869		565	17.796		565	16.534
565.5	7.449		565.5	6.387		565.5	6.727		565.5	8.543		565.5	7.672		565.5	9.742		565.5	10.546		565.5	10.013		565.5	9.316		565.5	11.211		565.5	18.646		565.5	14.6		565.5	15.608		565.5	16.957		565.5	15.663
566	6.412		566	6.722		566	6.067		566	8.361		566	7.852		566	9.387		566	10.141		566	9.834		566	10.066		566	10.785		566	16.545		566	14.45		566	14.617		566	16.275		566	15.906
566.5	6.522		566.5	6.554		566.5	5.65		566.5	8.352		566.5	7.761		566.5	8.741		566.5	9.882		566.5	9.333		566.5	10.27		566.5	11.629		566.5	16.788		566.5	12.728		566.5	15.15		566.5	15.657		566.5	14.458
567	6.111		567	6.303		567	5.906		567	8.514		567	7.05		567	9.381		567	9.26		567	9.186		567	9.919		567	10.863		567	16.195		567	12.89		567	14.374		567	15.352		567	14.766
567.5	5.997		567.5	5.682		567.5	5.513		567.5	7.934		567.5	7.509		567.5	8.894		567.5	9.662		567.5	8.823		567.5	9.316		567.5	9.761		567.5	15.92		567.5	12.261		567.5	14.513		567.5	13.519		567.5	14.434
568	5.37		568	5.987		568	6.005		568	7.47		568	7.292		568	8.935		568	9.196		568	8.397		568	9.078		568	9.642		568	15.757		568	11.422		568	12.661		568	13.485		568	14.017
568.5	5.719		568.5	5.704		568.5	5.276		568.5	7.09		568.5	6.805		568.5	8.903		568.5	8.578		568.5	8.854		568.5	8.882		568.5	9.702		568.5	14.807		568.5	11.307		568.5	13.109		568.5	13.124		568.5	13.767
569	5.65		569	5.775		569	5.015		569	7.504		569	7.858		569	8.383		569	8.576		569	8.421		569	8.221		569	9.163		569	14.222		569	10.992		569	12.3		569	12.889		569	13.72
569.5	4.922		569.5	5.516		569.5	5.353		569.5	6.689		569.5	6.256		569.5	8.435		569.5	8.079		569.5	8.03		569.5	8.17		569.5	8.96		569.5	14.419		569.5	11.19		569.5	11		569.5	13.2		569.5	13.507
570	4.748		570	6.119		570	5.016		570	7.04		570	6.563		570	7.735		570	7.562		570	7.792		570	8.211		570	7.839		570	12.852		570	10.263		570	11.393		570	12.697		570	12.29
570.5	5.471		570.5	5.21		570.5	4.81		570.5	6.391		570.5	6.197		570.5	7.147		570.5	7.948		570.5	7.752		570.5	7.688		570.5	9.21		570.5	14.161		570.5	10.047		570.5	11.752		570.5	12.435		570.5	12.024
571	5.14		571	5.359		571	4.791		571	6.068		571	6.255		571	6.862		571	7.538		571	7.517		571	7.6		571	8.664		571	13.387		571	10.426		571	11.995		571	11.523		571	11.636
571.5	4.788		571.5	5.411		571.5	5.017		571.5	5.979		571.5	5.893		571.5	7.102		571.5	7.545		571.5	6.972		571.5	7.526		571.5	8.311		571.5	12.257		571.5	9.966		571.5	11.09		571.5	11.231		571.5	11.592
572	4.915		572	4.542		572	4.67		572	5.973		572	6.283		572	6.553		572	7.23		572	7.07		572	7.07		572	8.189		572	13.234		572	9.883		572	10.337		572	11.57		572	11.205
572.5	4.835		572.5	4.464		572.5	4.28		572.5	5.92		572.5	5.191		572.5	7.066		572.5	6.784		572.5	7.174		572.5	7.587		572.5	8		572.5	12.105		572.5	9.678		572.5	10.635		572.5	10.639		572.5	10.857
573	3.925		573	4.909		573	4.692		573	5.511		573	5.679		573	6.934		573	6.876		573	7.543		573	7.085		573	7.735		573	11.447		573	8.689		573	10.863		573	11.08		573	10.098
573.5	3.9		573.5	4.71		573.5	4.321		573.5	5.747		573.5	4.721		573.5	6.746		573.5	6.522		573.5	6.925		573.5	6.953		573.5	7.33		573.5	10.931		573.5	8.65		573.5	9.616		573.5	9.811		573.5	10.601
574	4.518		574	5.031		574	3.92		574	5.392		574	5.043		574	6.196		574	7.236		574	6.263		574	6.547		574	6.464		574	11.303		574	8.48		574	9.924		574	10.378		574	10.263
574.5	4.298		574.5	4.689		574.5	3.994		574.5	5.474		574.5	5.537		574.5	6.087		574.5	6.686		574.5	5.909		574.5	6.529		574.5	7.492		574.5	10.856		574.5	8.419		574.5	8.862		574.5	9.905		574.5	9.637
575	4.122		575	4.634		575	4.317		575	5.717		575	4.984		575	6.346		575	6.255		575	6.639		575	5.686		575	6.736		575	10.751		575	8.024		575	8.542		575	9.867		575	9.891
575.5	4.519		575.5	4.749		575.5	3.834		575.5	5.058		575.5	4.874		575.5	6.072		575.5	6.053		575.5	6.488		575.5	6.767		575.5	6.506		575.5	9.761		575.5	7.367		575.5	8.538		575.5	9.449		575.5	9.738
576	3.815		576	4.39		576	4.185		576	4.834		576	4.812		576	5.666		576	5.89		576	5.989		576	6.086		576	5.562		576	8.762		576	7.279		576	10.051		576	8.235		576	9.329
576.5	4.215		576.5	4.953		576.5	4.116		576.5	4.791		576.5	4.932		576.5	5.859		576.5	5.724		576.5	5.655		576.5	6.057		576.5	6.832		576.5	9.1		576.5	6.73		576.5	8.668		576.5	8.811		576.5	8.774
577	3.909		577	4.138		577	4.051		577	5.27		577	4.492		577	5.879		577	6.312		577	5.655		577	4.875		577	6.571		577	9.455		577	7.241		577	8.029		577	8.331		577	8.831
577.5	3.663		577.5	4.525		577.5	3.844		577.5	5.228		577.5	4.07		577.5	5.244		577.5	5.448		577.5	5.264		577.5	6.215		577.5	6.424		577.5	8.943		577.5	6.982		577.5	7.318		577.5	9.064		577.5	8.589
578	3.49		578	4.005		578	3.848		578	5.044		578	4.669		578	5.064		578	5.313		578	5.756		578	5.415		578	5.51		578	9.092		578	6.445		578	8.075		578	8.447		578	9.325
578.5	4.074		578.5	3.792		578.5	3.403		578.5	4.649		578.5	4.273		578.5	5.42		578.5	5.944		578.5	6.504		578.5	5.152		578.5	5.745		578.5	8.956		578.5	6.665		578.5	7.551		578.5	8.523		578.5	8.448
579	3.828		579	3.718		579	3.765		579	4.249		579	4.325		579	5.342		579	6.278		579	6.046		579	5.276		579	5.791		579	8.081		579	6.867		579	7.348		579	7.855		579	8.715
579.5	4.086		579.5	3.827		579.5	3.436		579.5	4.629		579.5	4.095		579.5	5.475		579.5	5.123		579.5	5.127		579.5	5.498		579.5	5.644		579.5	8.696		579.5	6.459		579.5	7.511		579.5	7.645		579.5	8.238
580	4.068		580	3.362		580	3.628		580	3.828		580	4.372		580	5.284		580	5.551		580	5.029		580	5.463		580	4.906		580	8.81		580	6.165		580	7.485		580	7.73		580	7.656
580.5	3.739		580.5	4.145		580.5	3.504		580.5	4.322		580.5	4.149		580.5	4.723		580.5	5.05		580.5	4.223		580.5	4.541		580.5	5.763		580.5	8.064		580.5	5.818		580.5	7.182		580.5	7.499		580.5	8.021
581	4.049		581	3.967		581	3.449		581	4.246		581	3.289		581	4.954		581	5.562		581	5.313		581	4.518		581	5.126		581	8.071		581	6.255		581	6.361		581	6.627		581	8.022
581.5	3.433		581.5	3.779		581.5	3.203		581.5	4.634		581.5	3.561		581.5	4.798		581.5	5.367		581.5	5.64		581.5	5.041		581.5	5.087		581.5	7.993		581.5	6.102		581.5	5.998		581.5	6.89		581.5	7.926
582	3.096		582	3.672		582	3.226		582	4.143		582	3.613		582	4.806		582	5.043		582	5.098		582	5.429		582	5.238		582	9.064		582	5.859		582	6.645		582	7.091		582	6.532
582.5	3.406		582.5	4.059		582.5	3.266		582.5	3.935		582.5	3.714		582.5	5.007		582.5	5.289		582.5	5.266		582.5	4.824		582.5	5.043		582.5	7.436		582.5	5.702		582.5	5.982		582.5	6.99		582.5	7.068
583	3.228		583	3.562		583	2.907		583	3.799		583	3.803		583	4.519		583	4.639		583	5.104		583	4.762		583	4.874		583	7.66		583	5.779		583	6.178		583	6.693		583	7.126
583.5	3.118		583.5	3.75		583.5	3.04		583.5	3.717		583.5	3.51		583.5	4.629		583.5	4.666		583.5	4.994		583.5	4.316		583.5	4.786		583.5	6.591		583.5	5.209		583.5	5.673		583.5	6.61		583.5	7.286
584	3.109		584	2.926		584	2.805		584	3.744		584	3.274		584	3.758		584	4.912		584	4.713		584	4.537		584	5.041		584	7.223		584	5.635		584	5.836		584	6.685		584	6.976
584.5	2.894		584.5	3.025		584.5	3.206		584.5	3.332		584.5	3.139		584.5	4.519		584.5	4.564		584.5	4.325		584.5	4.899		584.5	4.393		584.5	6.5		584.5	5.031		584.5	5.716		584.5	6.691		584.5	6.313
585	3.03		585	3.329		585	3.541		585	3.439		585	3.448		585	4.319		585	4.927		585	4.315		585	3.764		585	5.057		585	7.095		585	5.173		585	5.608		585	6.308		585	6.369
585.5	3.235		585.5	3.054		585.5	2.906		585.5	3.857		585.5	3.504		585.5	4.799		585.5	3.989		585.5	4.541		585.5	4.45		585.5	5.295		585.5	6.49		585.5	5.278		585.5	5.326		585.5	5.788		585.5	6.826
586	3.021		586	2.877		586	3.04		586	3.9		586	3.25		586	3.625		586	3.836		586	4.542		586	4.333		586	4.895		586	6.953		586	5.071		586	5.516		586	6.804		586	5.497
586.5	3.02		586.5	3.114		586.5	2.576		586.5	3.9		586.5	3.132		586.5	4.504		586.5	4.682		586.5	4.384		586.5	4.24		586.5	4.191		586.5	6.858		586.5	4.991		586.5	5.775		586.5	6.812		586.5	6.483
587	3.165		587	2.821		587	3.005		587	3.757		587	3.329		587	4.26		587	5.12		587	4.115		587	4.62		587	4.381		587	7.175		587	4.744		587	5.739		587	6.192		587	6.753
587.5	2.821		587.5	3.299		587.5	2.577		587.5	3.233		587.5	3.11		587.5	3.663		587.5	4.514		587.5	4.623		587.5	4.033		587.5	4.459		587.5	6.36		587.5	4.925		587.5	4.573		587.5	5.647		587.5	6.464
588	2.833		588	3.024		588	2.7		588	3.326		588	2.833		588	4.102		588	4.303		588	4.192		588	3.812		588	4.12		588	6.5		588	4.774		588	4.728		588	6.265		588	5.94
588.5	3.039		588.5	3.147		588.5	2.441		588.5	3.338		588.5	2.412		588.5	4.17		588.5	4.686		588.5	3.624		588.5	3.895		588.5	4.604		588.5	6.19		588.5	5.032		588.5	4.476		588.5	5.904		588.5	6.023
589	2.967		589	3.005		589	2.837		589	3.168		589	2.638		589	3.996		589	3.853		589	4.616		589	3.896		589	4.279		589	5.844		589	4.913		589	5.159		589	5.472		589	5.422
589.5	2.828		589.5	2.929		589.5	2.748		589.5	3.603		589.5	2.677		589.5	4.054		589.5	4.352		589.5	3.97		589.5	4.07		589.5	4.912		589.5	6.369		589.5	4.306		589.5	5.319		589.5	5.882		589.5	6.512
590	2.902		590	2.883		590	2.593		590	3.291		590	2.991		590	3.847		590	3.448		590	4.392		590	3.989		590	3.762		590	5.612		590	4.184		590	4.673		590	5.388		590	5.854
590.5	2.257		590.5	3.113		590.5	2.935		590.5	3.273		590.5	2.954		590.5	4.108		590.5	4.169		590.5	3.56		590.5	3.768		590.5	3.869		590.5	5.945		590.5	4.233		590.5	4.886		590.5	5.443		590.5	5.298
591	2.525		591	2.966		591	2.388		591	2.619		591	2.743		591	3.757		591	4.004		591	3.854		591	3.534		591	3.448		591	6.535		591	4.422		591	4.899		591	5.694		591	5.078
591.5	2.222		591.5	3.137		591.5	2.702		591.5	3.116		591.5	3.038		591.5	3.604		591.5	4.075		591.5	3.523		591.5	3.918		591.5	3.698		591.5	6.045		591.5	5.022		591.5	4.791		591.5	5.232		591.5	5.718
592	2.336		592	3.299		592	2.327		592	3.342		592	2.726		592	3.81		592	4.447		592	3.759		592	4.053		592	3.86		592	6.065		592	4.034		592	4.207		592	5.031		592	5.254
592.5	2.578		592.5	2.568		592.5	2.459		592.5	3.567		592.5	3.184		592.5	3.35		592.5	3.88		592.5	4.164		592.5	3.693		592.5	3.435		592.5	5.822		592.5	3.976		592.5	5.129		592.5	5.272		592.5	5.878
593	2.647		593	2.623		593	2.713		593	3.352		593	2.582		593	3.958		593	3.729		593	3.504		593	3.768		593	3.742		593	5.36		593	3.943		593	5.001		593	5.511		593	4.994
593.5	2.979		593.5	2.472		593.5	2.084		593.5	3.266		593.5	3.028		593.5	3.492		593.5	4.013		593.5	3.768		593.5	3.486		593.5	3.669		593.5	5.177		593.5	4.003		593.5	4.563		593.5	5.068		593.5	5.418
594	2.926		594	2.595		594	2.486		594	3.256		594	2.556		594	3.581		594	3.015		594	3.699		594	4.029		594	3.411		594	5.666		594	3.853		594	4.165		594	5.601		594	5.471
594.5	2.367		594.5	2.474		594.5	2.541		594.5	2.82		594.5	2.43		594.5	3.979		594.5	3.411		594.5	3.943		594.5	3.559		594.5	3.495		594.5	5.157		594.5	3.74		594.5	4.43		594.5	4.86		594.5	4.646
595	2.373		595	2.553		595	2.583		595	2.689		595	2.401		595	3.46		595	3.832		595	3.569		595	3.785		595	3.43		595	5.312		595	4.199		595	4.251		595	4.988		595	4.859
595.5	2.38		595.5	3.041		595.5	2.535		595.5	3.108		595.5	2.453		595.5	3.571		595.5	3.9		595.5	3.789		595.5	3.642		595.5	3.505		595.5	4.722		595.5	3.851		595.5	3.897		595.5	5.056		595.5	5.113
596	2.585		596	2.225		596	2.426		596	2.996		596	2.205		596	4.492		596	3.559		596	3.917		596	3.094		596	3.486		596	5.341		596	4.17		596	3.737		596	4.881		596	5.206
596.5	2.69		596.5	2.061		596.5	2.287		596.5	3.095		596.5	2.453		596.5	3.778		596.5	3.547		596.5	3.81		596.5	3.332		596.5	3.679		596.5	5.446		596.5	4.243		596.5	4.079		596.5	4.843		596.5	5.057
597	2.522		597	2.289		597	2.363		597	2.623		597	2.237		597	3.67		597	3.246		597	3.485		597	3.41		597	3.703		597	5.278		597	4.14		597	4.212		597	4.392		597	5.342
597.5	2.116		597.5	2.049		597.5	2.951		597.5	2.41		597.5	2.336		597.5	3.198		597.5	3.177		597.5	3.495		597.5	3.448		597.5	3.75		597.5	5.412		597.5	3.647		597.5	3.63		597.5	5.005		597.5	5.148
598	2.589		598	2.945		598	2.385		598	2.838		598	2.365		598	3.259		598	3.51		598	3.434		598	3.338		598	3.806		598	4.931		598	3.176		598	4.607		598	5.04		598	5.104
598.5	2.345		598.5	2.769		598.5	2.112		598.5	2.765		598.5	2.701		598.5	3.235		598.5	2.991		598.5	3.762		598.5	3.4		598.5	3.604		598.5	5.268		598.5	3.464		598.5	4.049		598.5	4.52		598.5	5.233
599	2.414		599	2.524		599	2.17		599	2.987		599	2.152		599	3.494		599	3.519		599	3.505		599	3.627		599	3.496		599	5.324		599	3.892		599	3.943		599	4.726		599	5.155
599.5	2.502		599.5	2.53		599.5	2.563		599.5	2.978		599.5	2.513		599.5	3.204		599.5	3.653		599.5	3.609		599.5	3.499		599.5	4.022		599.5	4.843		599.5	3.272		599.5	4.019		599.5	4.6		599.5	4.515
600	2.311		600	2.562		600	2.204		600	3.033		600	2.213		600	2.532		600	3.467		600	3.745		600	3.374		600	3.467		600	4.777		600	3.352		600	4.056		600	3.896		600	4.089
600.5	1.998		600.5	2.584		600.5	-0.181		600.5	2.543		600.5	1.938		600.5	1.754		600.5	3.285		600.5	4.575		600.5	1.444		600.5	2.62		600.5	4.907		600.5	3.725		600.5	3.989		600.5	1.871		600.5	4.939
